# Supplementary material for: Genome-wide association study in 176,678 Europeans reveals genetic loci for tanning response to sun exposure
Source: PubMed Central journal article supplement (PMC5940788; doi:10.1038/s41467-018-04086-y), 2018-05-08
Supplement: 41467_2018_4086_MOESM3_ESM.pdf [file 41467_2018_4086_MOESM3_ESM.pdf]

## **Description of Additional Supplementary Files**

File Name: Supplementary Data 1

Description: The association summary statistics for the 10,834 genome-wide significant SNPs are provided as Supplementary Data 1.

File Name: Supplementary Data 2

Description: Genomic coordinates are reported in GRCh37.p13. The association summary statistics for the SNPs associated in the UKBB non-melanoma skin cancer GWAS ( $P < 1 \times 10^{-5}$ ) are provided as Supplementary Data 2.

File Name: Supplementary Data 3

Description: Genomic coordinates are reported in GRCh37.p13. The ciseQTLs identified in the three studied skin tissues, and available within the GTEx project, are provided as Supplementary Data 3.
