# Supplementary material for: Genome-wide association study in 176,678 Europeans reveals genetic loci for tanning response to sun exposure
Source: Nat Commun. 2018 May 8;9:1684. doi: 10.1038/s41467-018-04086-y (PMC5940788; doi:10.1038/s41467-018-04086-y)
Supplement: Supplementary file 1 — Supplementary Information [file 41467_2018_4086_MOESM1_ESM.pdf]

**Genome-wide association study in 176,678 Europeans reveals genetic loci for tanning response to sun exposure**

Visconti *et al*

## Supplementary Figures

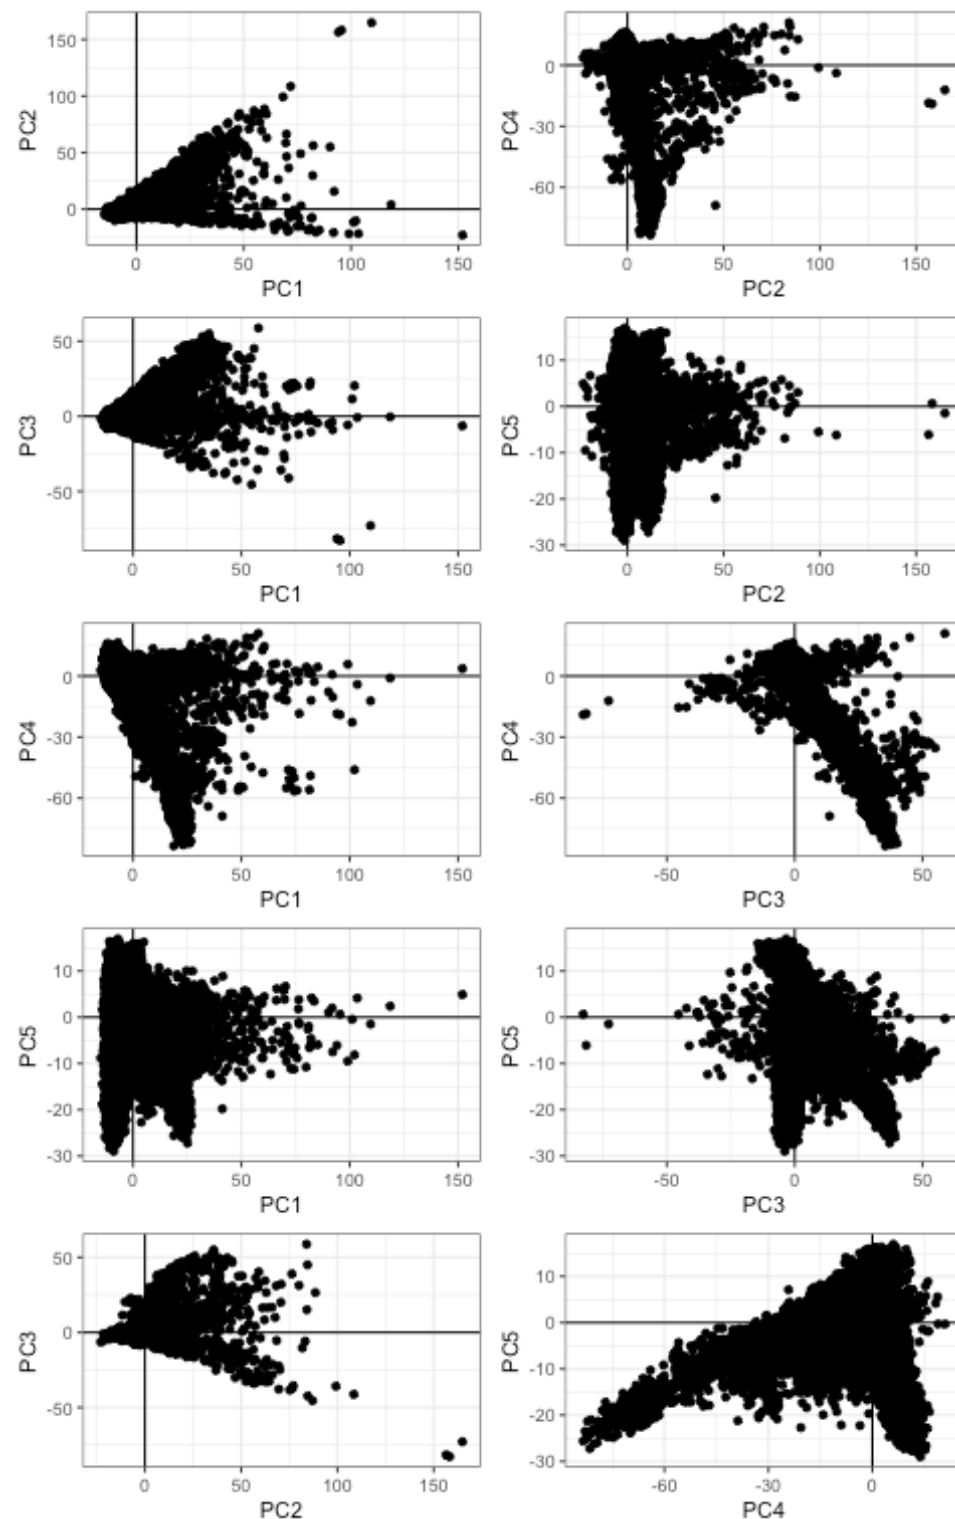

**Supplementary Figure 1. Scatterplot of the first five principal components assessed on the UKBB genomic data.** These principal components were added to the association model to control for potential stratification issues. Principal components were computed by the analysis group at the Wellcome Trust Centre for Human Genetics, University of Oxford. Details are provided at the UK Biobank website (<http://biobank.ctsu.ox.ac.uk>).

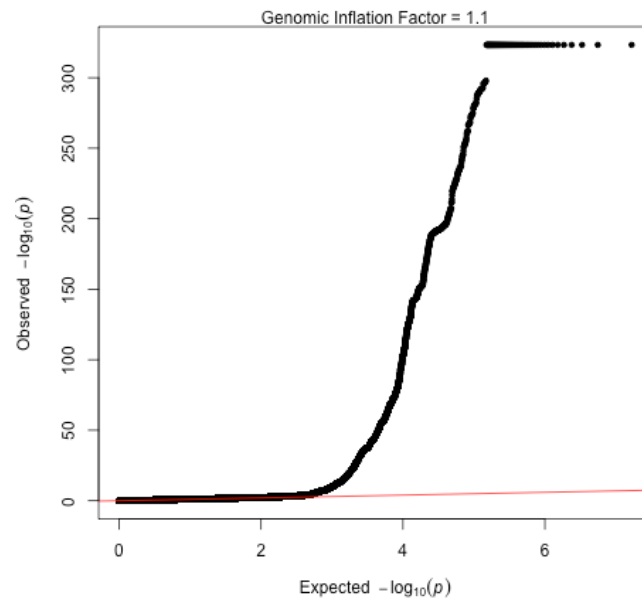

**Supplementary Figure 2. Quantile-Quantile plot of observed *versus* expected P values for the 8,351,141 SNPs in the UKBB study.** The P values were obtained by logistic regression analysis assuming additive model with sex and the first five principal components from the genotype data as covariates. P values are limited to  $5 \times 10^{-324}$  due to the minimum precision allowed by R and the *qqman* package.

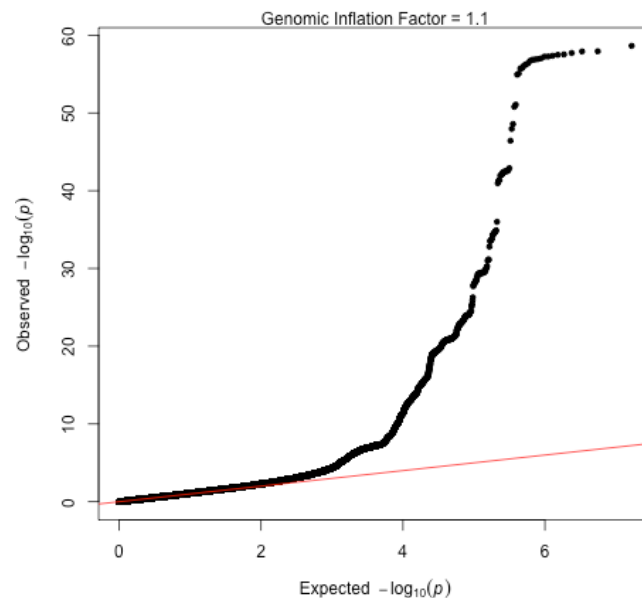

**Supplementary Figure 3. Quantile-Quantile plot of observed *versus* expected P values after removing loci previously associated with ease of skin tanning.** The P values were obtained by logistic regression analysis assuming additive model with sex and the first five principal components from the genotype data as covariates. The SNPs at the loci harbouring the genes *HERC2/OCA2*, *IRF4*, *MC1R*, *RALY/ASIP*, *SLC45A2*, and *TYR* were removed, resulting in 8,342,077 SNPs.

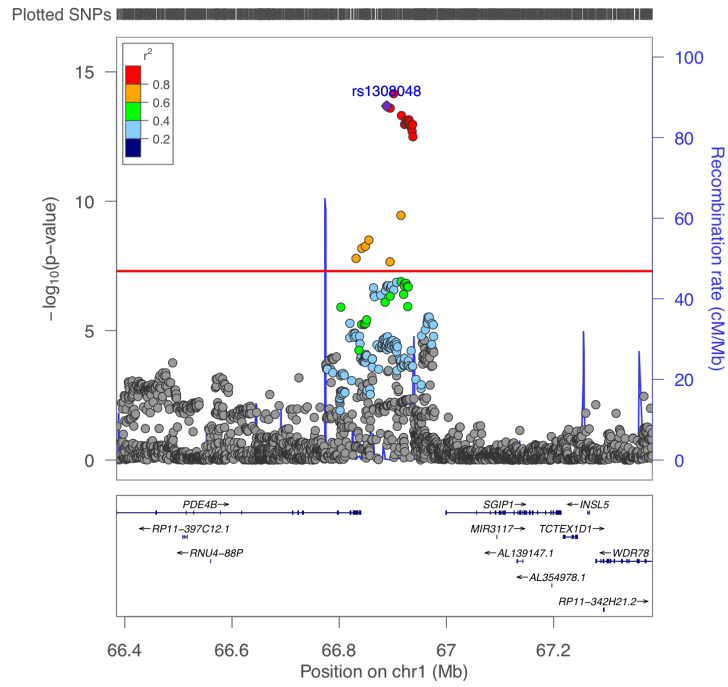

**Supplementary Figure 4. Regional plot (chr1:66831370-66937516).** Reference SNP is reported in blue. The horizontal red line shows the threshold of  $P=5 \times 10^{-8}$ . LD information was evaluated on the genotype data from the UKBB cohort.

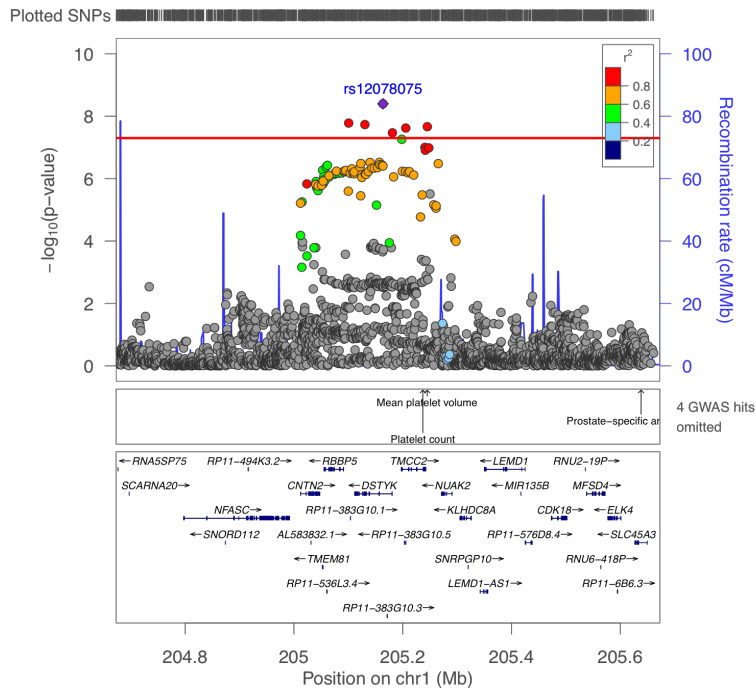

**Supplementary Figure 5. Regional plot (chr1:205100663-205245233).** Reference SNP is reported in blue. The horizontal red line shows the threshold of  $P=5 \times 10^{-8}$ . LD information was evaluated on the genotype data from the UKBB cohort.

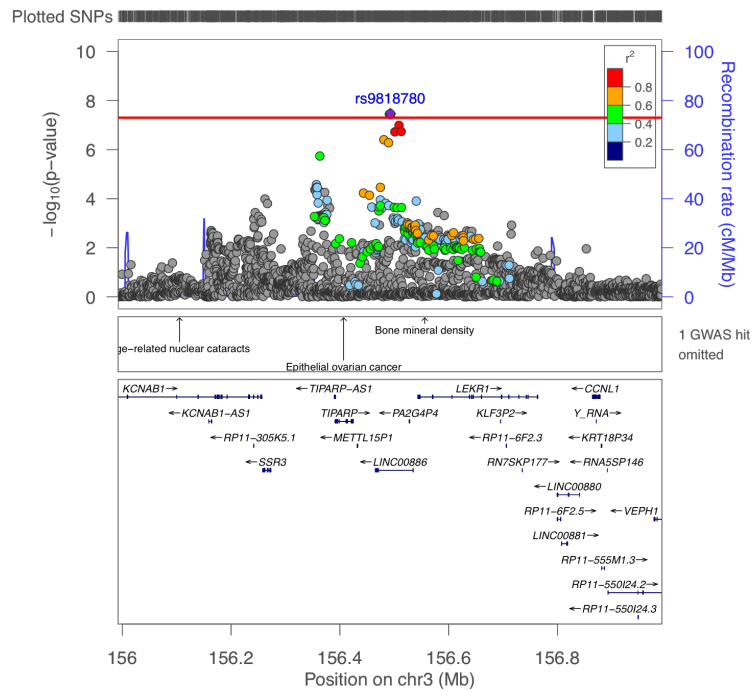

**Supplementary Figure 6. Regional plot (chr3:156491160-156493213).** Reference SNP is reported in blue. The horizontal red line shows the threshold of  $P=5 \times 10^{-8}$ . LD information was evaluated on the genotype data from the UKBB cohort.

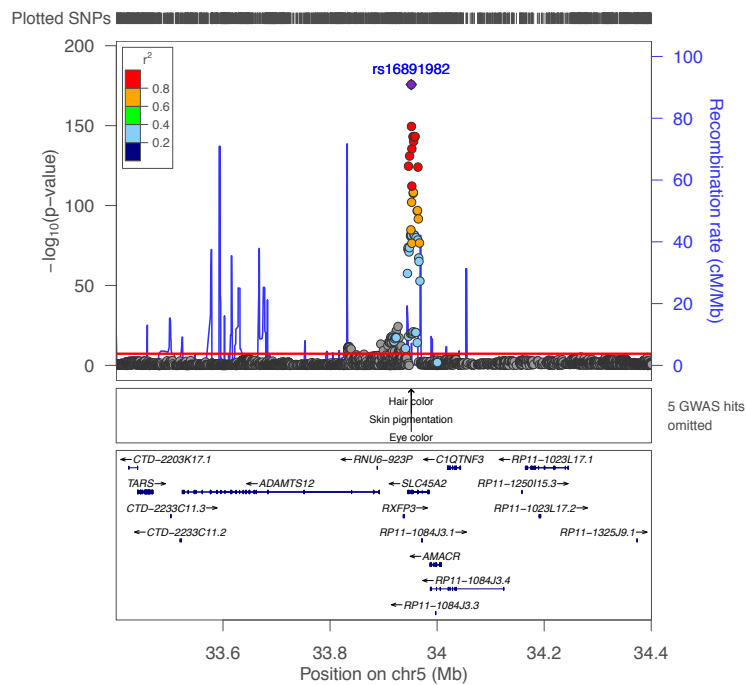

**Supplementary Figure 7. Regional plot (chr5:33832958-33967955).** Reference SNP is reported in blue. The horizontal red line shows the threshold of  $P=5 \times 10^{-8}$ . LD information was evaluated on the genotype data from the UKBB cohort.

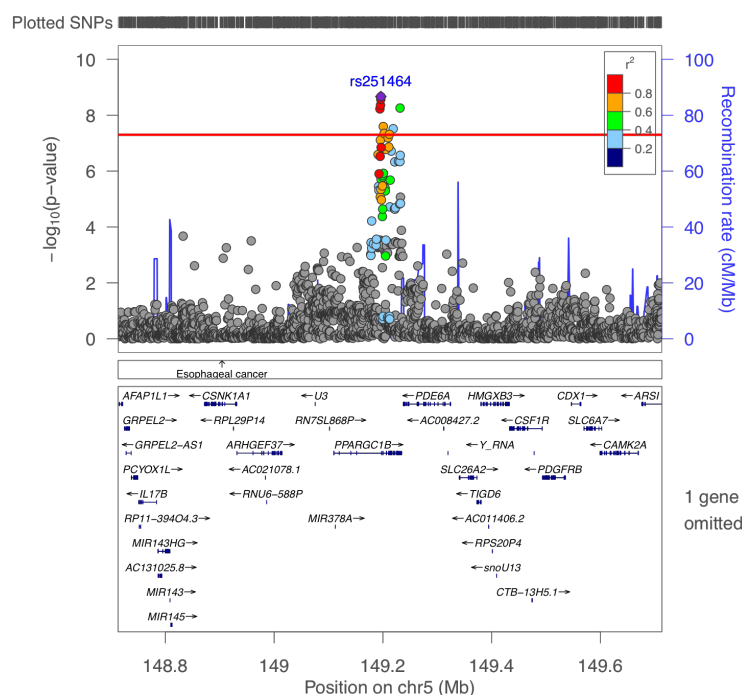

**Supplementary Figure 8. Regional plot (chr5:149194485-149231519).** Reference SNP is reported in blue. The horizontal red line shows the threshold of  $P=5 \times 10^{-8}$ . LD information was evaluated on the genotype data from the UKBB cohort.

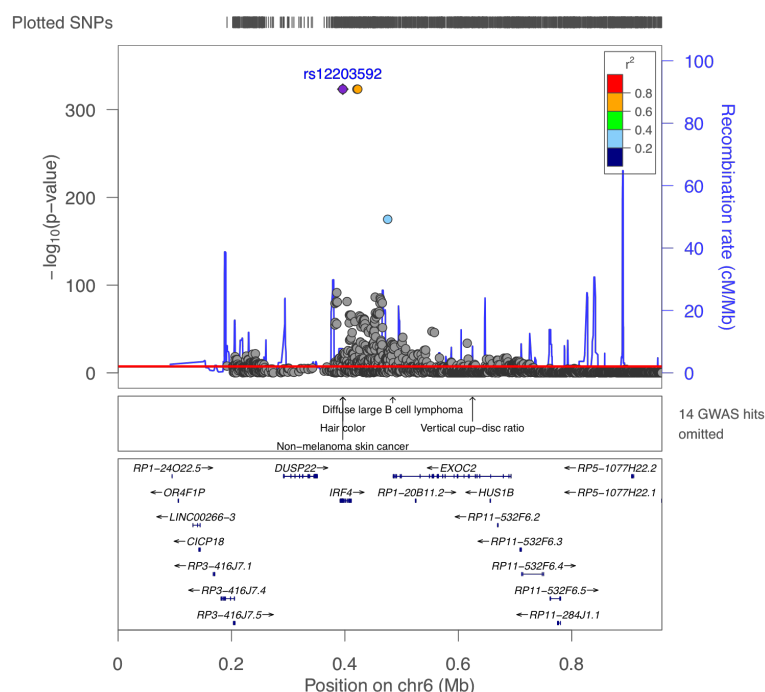

**Supplementary Figure 9. Regional plot (chr6:192181-726042).** Reference SNP is reported in blue. The horizontal red line shows the threshold of  $P=5 \times 10^{-8}$ . LD information was evaluated on the genotype data from the UKBB cohort. P values are limited to  $5 \times 10^{-324}$  due to the minimum precision allowed by the *Locuszoom* software.

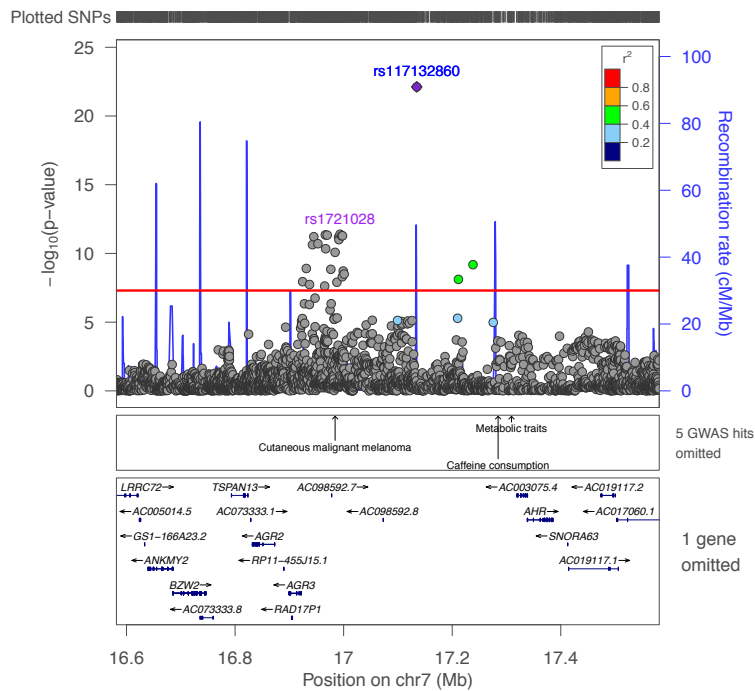

**Supplementary Figure 10. Regional plot (chr7:16924528-17238316).** Reference SNP is reported in blue; a further independent signal identified through conditional analysis is reported in violet. The horizontal red line shows the threshold of  $P=5 \times 10^{-8}$ . LD information was evaluated on the genotype data from the UKBB cohort.

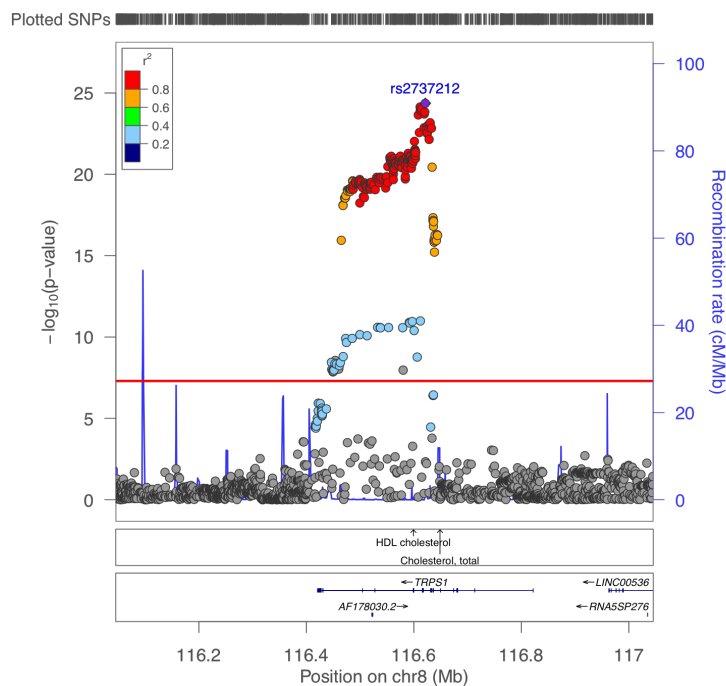

**Supplementary Figure 11. Regional plot (chr8:116446547-116644121).** Reference SNP is reported in blue. The horizontal red line shows the threshold of  $P=5 \times 10^{-8}$ . LD information was evaluated on the genotype data from the UKBB cohort.

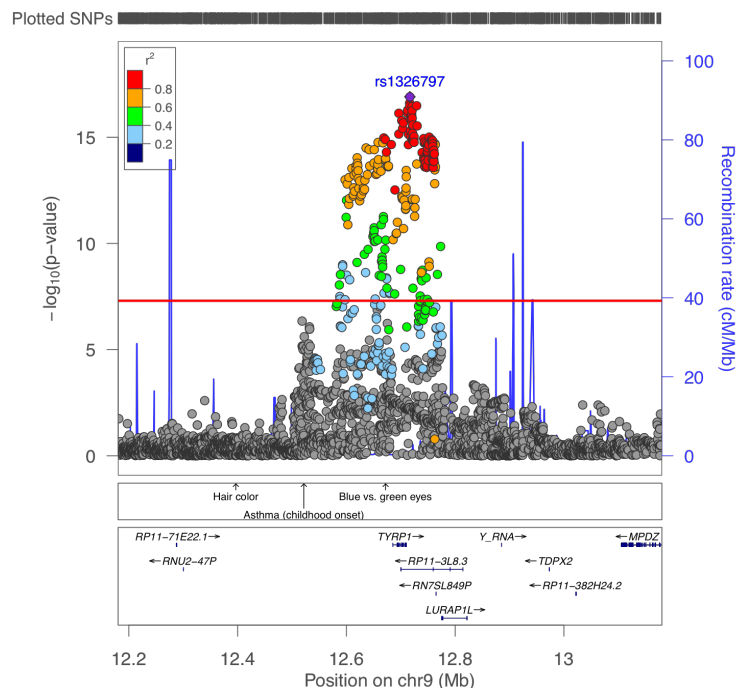

**Supplementary Figure 12. Regional plot (chr9:12587153-12773263).** Reference SNP is reported in blue. The horizontal red line shows the threshold of  $P = 5 \times 10^{-8}$ . LD information was evaluated on the genotype data from the UKBB cohort.

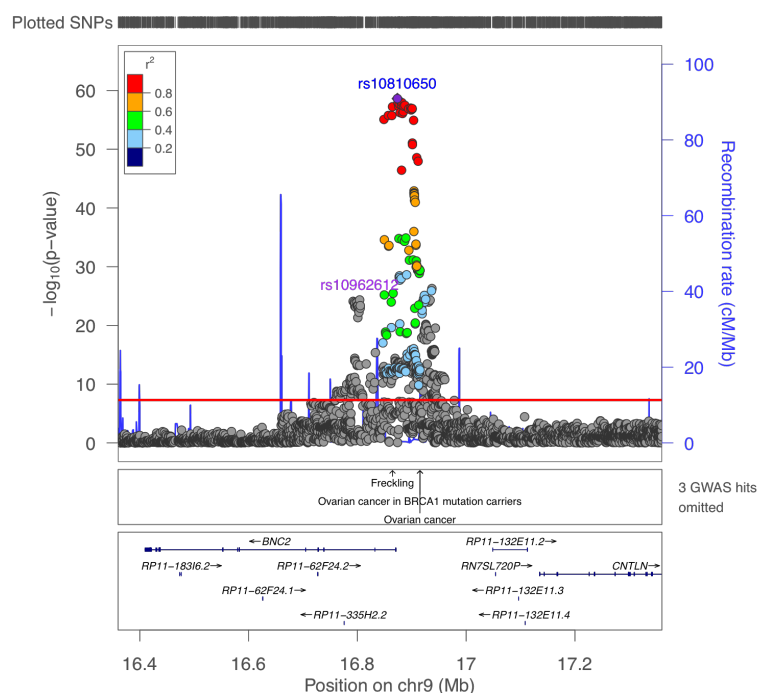

**Supplementary Figure 13. Regional plot (chr9:16759161-16960741).** Reference SNP is reported in blue, a further independent signal identified through conditional analysis is reported in violet. The horizontal red line shows the threshold of  $P = 5 \times 10^{-8}$ . LD information was evaluated on the genotype data from the UKBB cohort.

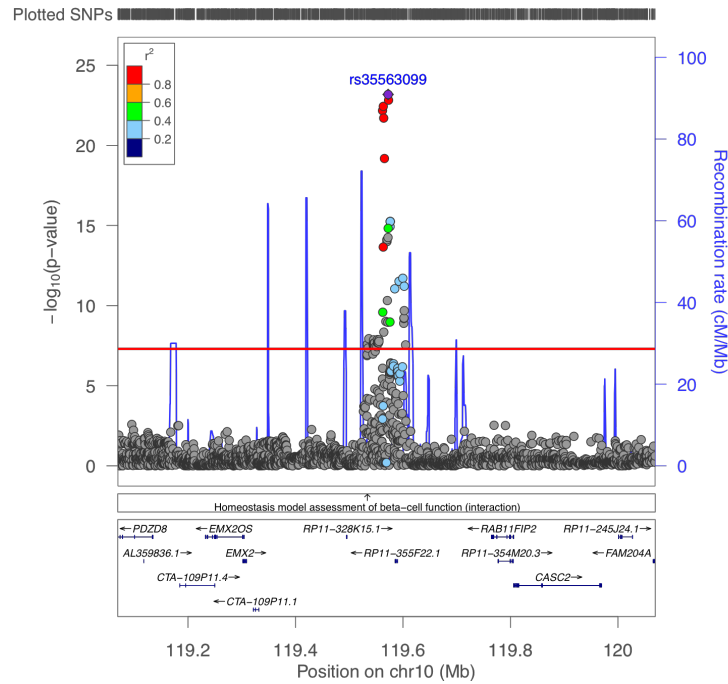

**Supplementary Figure 14. Regional plot (chr10:119533757-119604938).** Reference SNP is reported in blue. The horizontal red line shows the threshold of  $P=5 \times 10^{-8}$ . LD information was evaluated on the genotype data from the UKBB cohort.

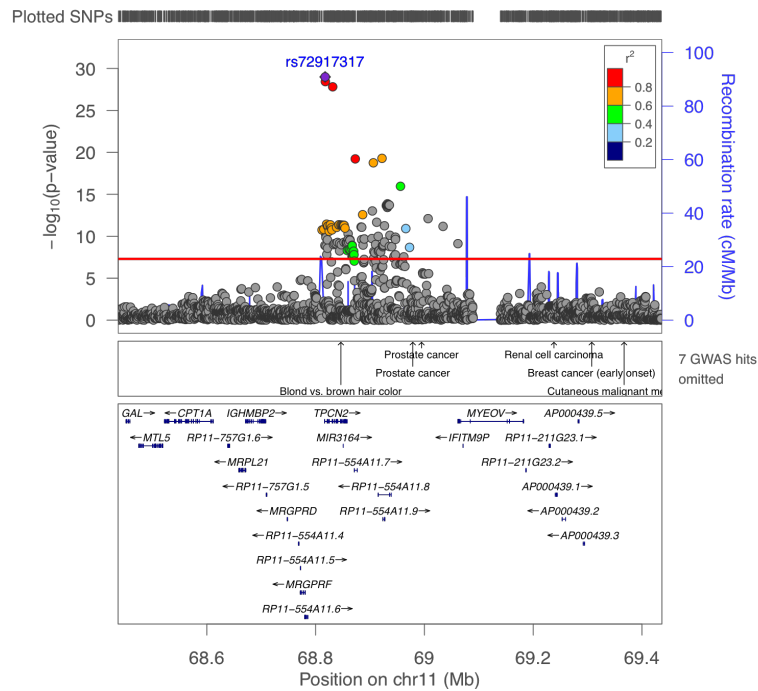

**Supplementary Figure 15. Regional plot (chr11:68811777-69061635).** Reference SNP is reported in blue. The horizontal red line shows the threshold of  $P=5 \times 10^{-8}$ . LD information was evaluated on the genotype data from the UKBB cohort.

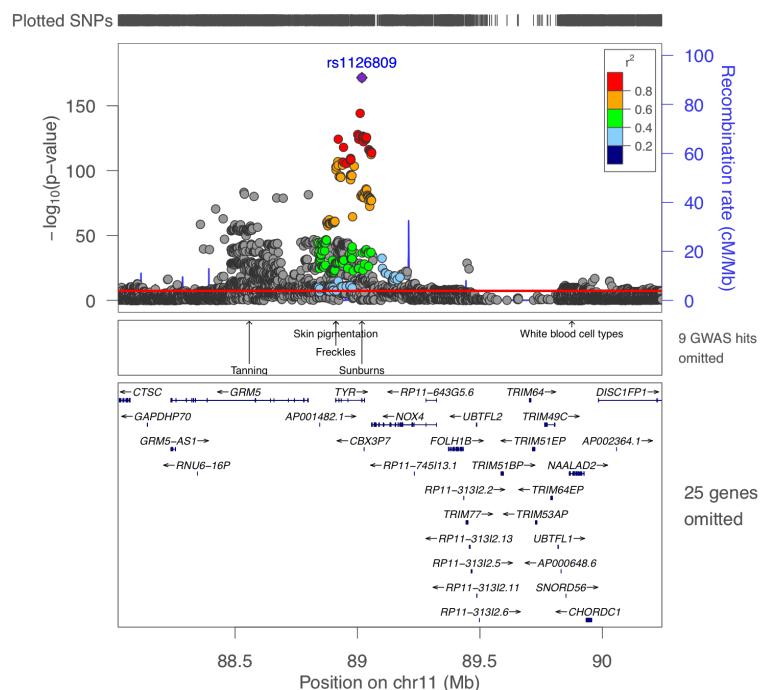

**Supplementary Figure 16. Regional plot (chr11:88032224-90233385).** Reference SNP is reported in blue. The horizontal red line shows the threshold of  $P=5 \times 10^{-8}$ . LD information was evaluated on the genotype data from the UKBB cohort.

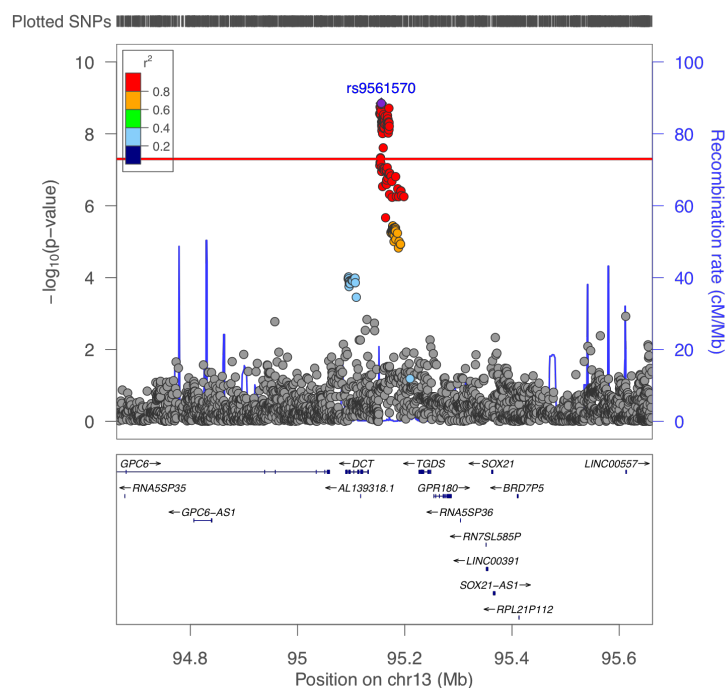

**Supplementary Figure 17. Regional plot (chr13:95153167-95171058).** Reference SNP is reported in blue. The horizontal red line shows the threshold of  $P=5 \times 10^{-8}$ . LD information was evaluated on the genotype data from the UKBB cohort.

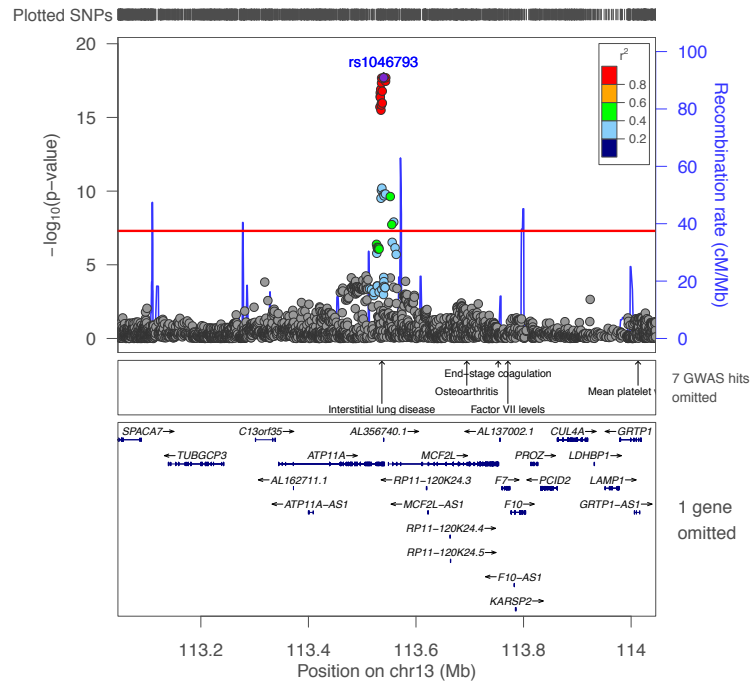

**Supplementary Figure 18. Regional plot (chr13:113532990-113558599).** Reference SNP is reported in blue. The horizontal red line shows the threshold of  $P=5 \times 10^{-8}$ . LD information was evaluated on the genotype data from the UKBB cohort.

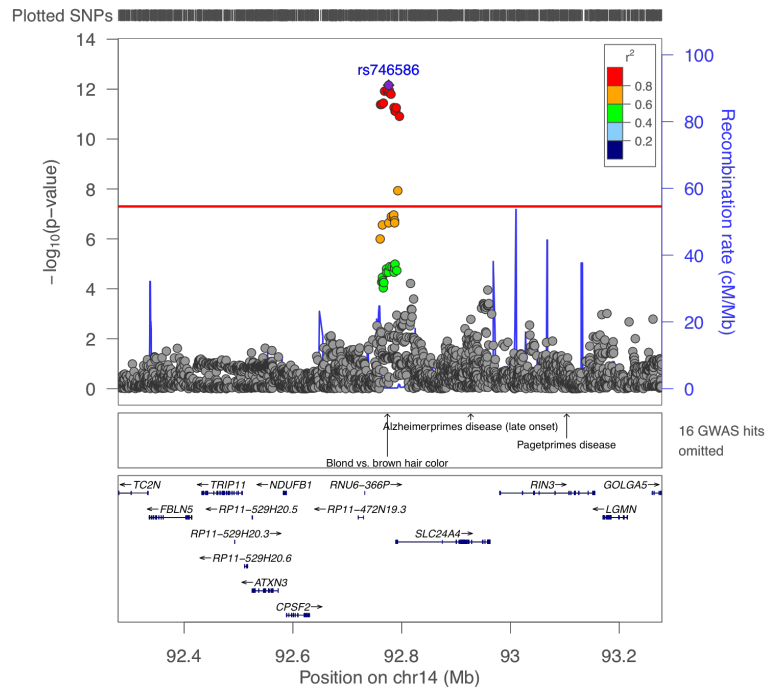

**Supplementary Figure 19. Regional plot (chr14:92761113-92795912).** Reference SNP is reported in blue. The horizontal red line shows the threshold of  $P=5 \times 10^{-8}$ . LD information was evaluated on the genotype data from the UKBB cohort.



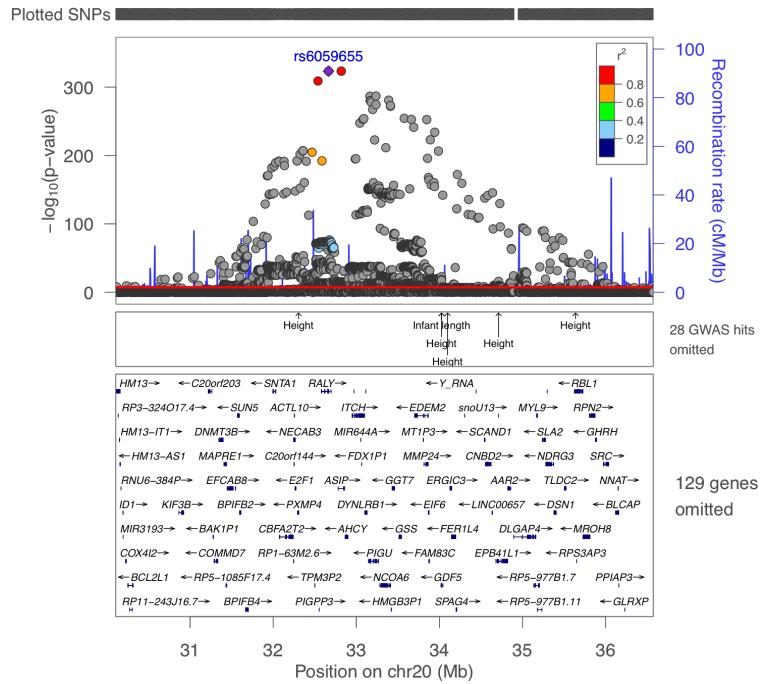

**Supplementary Figure 22. Regional plot (chr20:30115523-36562529).** Reference SNP is reported in blue. The horizontal red line shows the threshold of  $P=5 \times 10^{-8}$ . LD information was evaluated on the genotype data from the UKBB cohort. P values are limited to  $5 \times 10^{-324}$  due to the minimum precision allowed by the *Locuszoom* software.

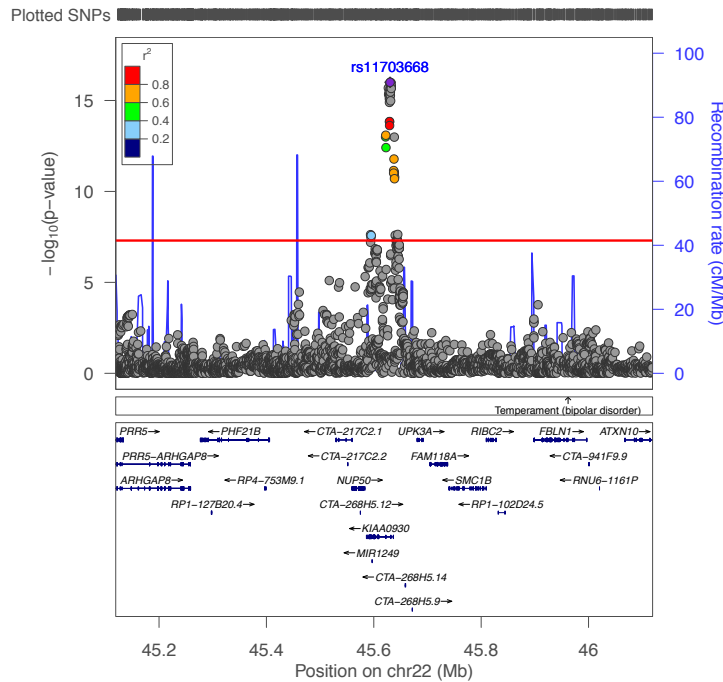

**Supplementary Figure 23. Regional plot (chr22:45594002-45644654).** Reference SNP is reported in blue. The horizontal red line shows the threshold of  $P=5 \times 10^{-8}$ . LD information was evaluated on the genotype data from the UKBB cohort.

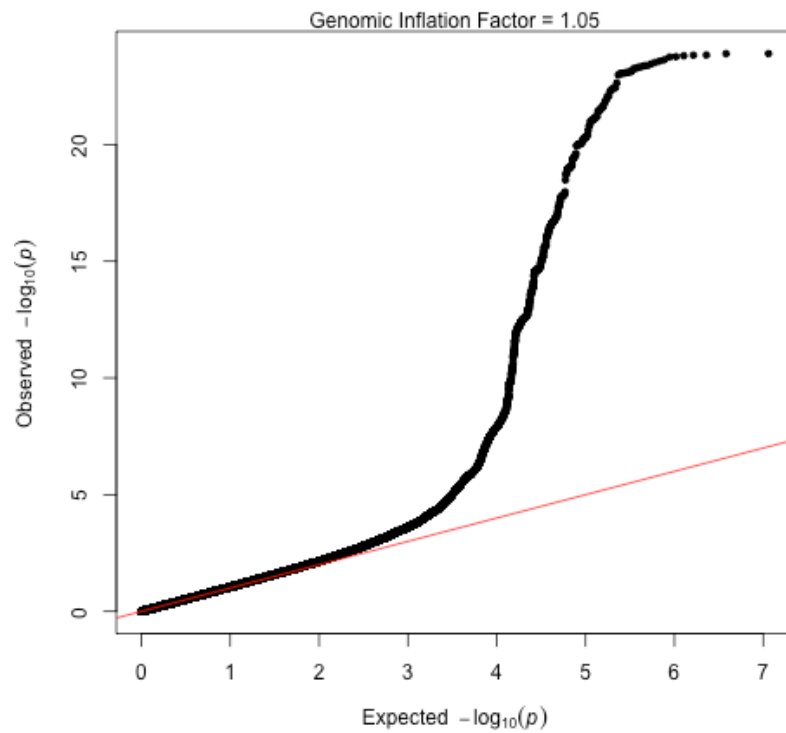

**Supplementary Figure 24. Quantile-Quantile plot of observed *versus* expected P values for the 5,734,850 SNPs in the UKBB study for non-melanoma skin cancer.** The P values were obtained by logistic regression analysis assuming additive model with age, sex, genotyping array, and the first five principal components from the genotype data as covariates.

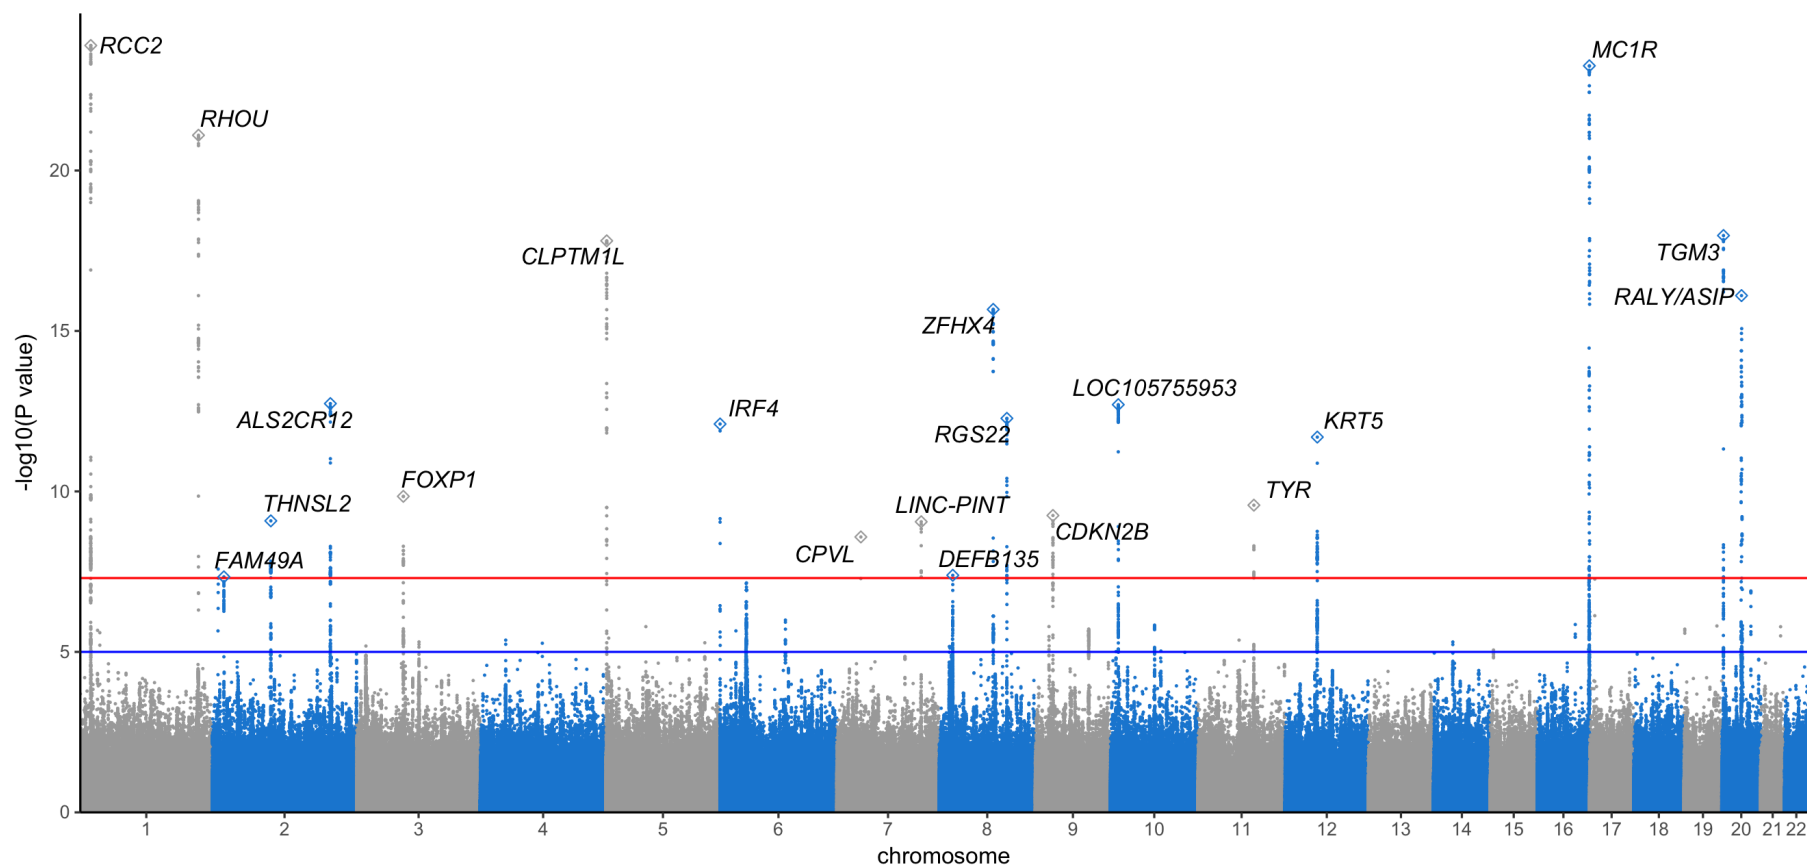

**Supplementary Figure 25. Manhattan plot of non-melanoma skin cancer results in UKBB, second release.** The P values were obtained by logistic regression analysis assuming an additive genetic model with age, sex, genotyping array, and the first five principal components of the genotype data as covariates. The x-axis shows the genomic coordinates (GRCh37.p13) of the tested SNPs and the y-axis shows the  $-\log_{10}$  P value of their association. The horizontal red line indicates the threshold for genome-wide significance at  $5.0 \times 10^{-8}$ , the horizontal blue line indicates a relaxed threshold of  $1.0 \times 10^{-5}$

## Supplementary Tables

**Supplementary Table 1. Phenotypic details of the individuals in the UKBB study sample.**

|                          | N      | Mean Age | SD   | First Quantile | Third Quantile |
|--------------------------|--------|----------|------|----------------|----------------|
| <i>Low tan response</i>  |        |          |      |                |                |
| All                      | 46,768 | 56.58    | 8.12 | 50.00          | 63.00          |
| Male                     | 18,256 | 56.62    | 8.27 | 50.00          | 63.00          |
| Female                   | 28,512 | 56.56    | 8.02 | 50.00          | 63.00          |
| <i>High tan response</i> |        |          |      |                |                |
| All                      | 74,528 | 57.09    | 7.99 | 51.00          | 64.00          |
| Male                     | 39,989 | 57.55    | 8.06 | 51.00          | 64.00          |
| Female                   | 34,539 | 56.55    | 7.88 | 50.00          | 63.00          |

**Supplementary Table 2. Summary of the 30 genetic loci identified in the UKBB sample.** For each locus, we reported the genomic coordinates (GRCh37.p13), the size of the region between the first and last genome-wide significant SNP ( $P < 5 \times 10^{-8}$ ), the number of SNPs passing genome-wide significance within the region ( $N_G$ ), and the number of independent signals ( $N_I$ ) for which we sought replication. We also reported if the locus was replicated. \* indicates that the locus only reached nominal significance in the replication step.

| Coordinates               | Size (bp) | $N_G$ | $N_I$ | Gene       | Replicated |
|---------------------------|-----------|-------|-------|------------|------------|
| chr1:63727542-63727542    | 1         | 1     | 1     | FOXD3      | yes*       |
| chr1:66831370-66937516    | 106147    | 26    | 1     | PDE4B      | yes        |
| chr1:205100663-205245233  | 144571    | 6     | 1     | RIPK5      | yes        |
| chr2:38166796-38321827    | 155032    | 50    | 1     | CYP1B1     | yes*       |
| chr3:85439136-85640418    | 201283    | 160   | 1     | CADM2      | no         |
| chr3:156491160-156493213  | 2054      | 3     | 1     | PA2G4P4    | yes        |
| chr5:33832958-33967955    | 134998    | 106   | 1     | SLC45A2    | yes        |
| chr5:59016897-59028853    | 11957     | 12    | 1     | PDE4D      | yes*       |
| chr5:149194485-149231519  | 37035     | 9     | 1     | PPARGC1B   | yes        |
| chr6:192181-726042        | 533862    | 519   | 1     | IRF4       | yes        |
| chr7:16924528-17238316    | 313789    | 24    | 2     | AHR/AGR3   | yes        |
| chr8:116446547-116644121  | 197575    | 232   | 1     | TRPS1      | yes        |
| chr9:12587153-12773263    | 186111    | 223   | 1     | TYRP1      | yes        |
| chr9:16759161-16960741    | 201581    | 467   | 3     | BNC2       | yes        |
| chr10:119533757-119604938 | 71182     | 62    | 1     | EMX2       | yes        |
| chr11:68811777-69061635   | 249859    | 122   | 1     | TPCN2      | yes        |
| chr11:88032224-90233385   | 2201162   | 2103  | 2     | TYR        | yes        |
| chr12:88406164-89422075   | 1015912   | 111   | 1     | KITLG      | yes*       |
| chr13:95153167-95171058   | 17892     | 71    | 1     | DCT        | yes        |
| chr13:113532990-113558599 | 25610     | 24    | 1     | ATP11A     | yes        |
| chr14:92761113-92795912   | 34800     | 16    | 1     | SLC24A4    | yes        |
| chr15:28134352-29314924   | 1180573   | 316   | 3     | HERC2/OCA2 | yes        |
| chr15:29265171-29314924   | 49753     | 3     | 1     | APBA2      | no         |
| chr15:48426484-48485926   | 59443     | 2     | 1     | SLC24A5    | no         |
| chr16:71891862-71945613   | 53752     | 6     | 1     | IST1       | no         |
| chr16:88376014-90173553   | 1797540   | 2983  | 19    | MC1R       | yes        |
| chr20:25565515-25565515   | 1         | 1     | 1     | NINL       | no         |
| chr20:30115523-36562529   | 6447007   | 3128  | 2     | RALY/ASIP  | yes        |
| chr22:38551166-38552468   | 1303      | 2     | 1     | PLA2G6     | no         |
| chr22:45594002-45644654   | 50653     | 43    | 1     | KIAA0930   | yes        |

**Supplementary Table 3. Phenotypic details of the individuals in the TwinsUK sample.** The TwinsUK sample used in this study includes only female individuals.

|                          | N     | Mean Age | SD    | First Quantile | Third Quantile |
|--------------------------|-------|----------|-------|----------------|----------------|
| <i>Low tan response</i>  | 1,651 | 49.07    | 12.60 | 41.10          | 58.50          |
| <i>High tan response</i> | 2,286 | 49.65    | 12.34 | 42.03          | 58.33          |

**Supplementary Table 4. Phenotypic details of the individuals in the Rotterdam Study sample.**

|                          | N     | Mean Age | SD    | First Quantile | Third Quantile |
|--------------------------|-------|----------|-------|----------------|----------------|
| <i>Low tan response</i>  |       |          |       |                |                |
| All                      | 3,554 | 65.28    | 9.67  | 58.33          | 72.04          |
| Male                     | 1,390 | 64.12    | 8.91  | 58.03          | 69.98          |
| Female                   | 2,164 | 66.02    | 10.06 | 58.48          | 73.38          |
| <i>High tan response</i> |       |          |       |                |                |
| All                      | 6,897 | 64.94    | 9.29  | 58.24          | 71.13          |
| Male                     | 3,049 | 64.36    | 8.71  | 58.10          | 70.16          |
| Female                   | 3,848 | 65.40    | 9.68  | 58.38          | 71.87          |

**Supplementary Table 5. Phenotypic details of the individuals in the Queensland Institute of Medical Research (Brisbane Adolescent Twin Study, BATs) study sample: adolescent twins, siblings, and parents.**

|                          | N     | Mean Age | SD    | First Quantile | Third Quantile |
|--------------------------|-------|----------|-------|----------------|----------------|
| <i>Low tan response</i>  |       |          |       |                |                |
| All                      | 1,752 | 26.96    | 16.28 | 12.00          | 44.00          |
| Male                     | 816   | 26.45    | 16.88 | 12.00          | 44.00          |
| Female                   | 936   | 27.40    | 15.73 | 12.00          | 43.00          |
| <i>High tan response</i> |       |          |       |                |                |
| All                      | 1,549 | 27.82    | 16.33 | 12.00          | 44.00          |
| Male                     | 766   | 27.42    | 16.89 | 12.00          | 45.00          |
| Female                   | 783   | 28.21    | 15.77 | 12.00          | 43.00          |

**Supplementary Table 6. Phenotypic details of the individuals in the Queensland Institute of Medical Research (MARC7) study sample: adult twins.**

|                          | N     | Mean Age | SD   | First Quantile | Third Quantile |
|--------------------------|-------|----------|------|----------------|----------------|
| <i>Low tan response</i>  |       |          |      |                |                |
| All                      | 1,093 | 52.27    | 8.11 | 46.30          | 57.70          |
| Male                     | 526   | 53.00    | 8.26 | 47.00          | 58.40          |
| Female                   | 567   | 51.59    | 7.91 | 45.40          | 57.30          |
| <i>High tan response</i> |       |          |      |                |                |
| All                      | 755   | 52.40    | 7.93 | 46.30          | 57.90          |
| Male                     | 413   | 52.55    | 7.86 | 46.60          | 58.00          |
| Female                   | 342   | 52.21    | 8.03 | 46.10          | 57.60          |

**Supplementary Table 7. Phenotypic details of the individuals in the NHS, NHS2, and HPFS studies.**

|                          | <b>N</b> | <b>Mean Age</b> | <b>SD</b> | <b>First Quantile</b> | <b>Third Quantile</b> |
|--------------------------|----------|-----------------|-----------|-----------------------|-----------------------|
| <i>Low tan response</i>  |          |                 |           |                       |                       |
| All                      | 7,497    | 45.26           | 10.4      | 37.00                 | 52.00                 |
| Male                     | 2,670    | 54.86           | 8.74      | 48.00                 | 62.00                 |
| Female                   | 4,827    | 39.95           | 6.83      | 35.00                 | 44.00                 |
| <i>High tan response</i> |          |                 |           |                       |                       |
| All                      | 28,348   | 44.64           | 9.73      | 37.00                 | 51.00                 |
| Male                     | 7,613    | 54.72           | 8.68      | 47.00                 | 62.00                 |
| Female                   | 20,735   | 40.94           | 7.12      | 35.00                 | 47.00                 |

**Supplementary Table 8. Distribution of sex and ease of skin tanning in the five sub-studies of the NHS, NHS2, and HPFS cohorts.**

| <b>Platform</b>          | <b>Low tan response</b> | <b>High tan response</b> | <b>Male</b> | <b>Female</b> | <b>Total</b> |
|--------------------------|-------------------------|--------------------------|-------------|---------------|--------------|
| <i>Affymetrix</i>        | 5,384                   | 1,333                    | 2,977       | 3,740         | 6,717        |
| <i>Illumina_HumanHap</i> | 4,492                   | 1,101                    | 1,100       | 4,493         | 5,593        |
| <i>OmniExpress</i>       | 5,716                   | 1,348                    | 2,579       | 4,485         | 7,064        |
| <i>Oncoarray</i>         | 7,317                   | 1,914                    | 2,101       | 7,130         | 9,231        |
| <i>HumanCoreExome</i>    | 5,439                   | 1,801                    | 1,526       | 5,714         | 7,240        |
| <i>Total</i>             | 28,348                  | 7,497                    | 10,283      | 25,562        | 35,845       |

**Supplementary Table 9. Summary of associations replicated at a nominal significance.** For each SNP, we report the genomic coordinates (GRCh37.p13), the effect allele, the minor allele frequency (MAF), the odds ratio (OR) along with its 95% confidence interval (CI) and standard error (SE), the association P value in the discovery set ( $P_{UKBB}$ ), and the meta-analysis P values in the five independent replication cohorts ( $P_{replication}$ ). Positive odds ratios indicate a decreased tanning ability. + indicates that the SNP is a secondary signal detected through conditional analysis.

| SNP                    | CHR | BP       | Effect Allele | MAF  | OR (95% CI)      | SE   | $P_{UKBB}$             | $P_{replication}$     | Gene          |
|------------------------|-----|----------|---------------|------|------------------|------|------------------------|-----------------------|---------------|
| rs670318               | 1   | 63727542 | T             | 0.05 | 1.13 (1.09-1.17) | 0.02 | $4.58 \times 10^{-10}$ | $3.34 \times 10^{-2}$ | <i>FOXD3</i>  |
| rs336024               | 2   | 38279469 | C             | 0.19 | 1.07 (1.05-1.10) | 0.01 | $1.19 \times 10^{-10}$ | $4.67 \times 10^{-3}$ | <i>CYP1B1</i> |
| rs893191               | 5   | 59023325 | T             | 0.38 | 1.05 (1.03-1.07) | 0.01 | $1.50 \times 10^{-8}$  | $6.59 \times 10^{-3}$ | <i>PDE4D</i>  |
| rs1721028 <sup>+</sup> | 7   | 16993426 | C             | 0.42 | 1.06 (1.04-1.08) | 0.01 | $4.02 \times 10^{-12}$ | $8.80 \times 10^{-3}$ | <i>AGR3</i>   |
| rs11104947             | 12  | 88942980 | A             | 0.02 | 1.26 (1.18-1.35) | 0.03 | $7.47 \times 10^{-12}$ | $1.40 \times 10^{-2}$ | <i>KITLG</i>  |

**Supplementary Table 10. Summary of independent associations detected through the conditional analysis.** For each replicated independent signal identified in the conditional analysis, we report the genomic coordinates (GRCh37.p13), the effect allele, the minor allele frequency (MAF), the odds ratio (OR) along with its 95% confidence interval (CI) and standard error (SE), the association P value in the discovery set ( $P_{UKBB}$ ), and the meta-analysis P values in the five independent replication cohorts ( $P_{replication}$ ). Positive odds ratios indicate a decreased tanning ability.

| SNP        | CHR | BP       | Effect Allele | MAF  | OR (95% CI)      | SE   | $P_{UKBB}$              | $P_{replication}$       | Gene           |
|------------|-----|----------|---------------|------|------------------|------|-------------------------|-------------------------|----------------|
| rs10962612 | 9   | 16804167 | T             | 0.24 | 0.90 (0.88-0.92) | 0.01 | $4.49 \times 10^{-25}$  | $4.49 \times 10^{-12}$  | <i>BCN2</i>    |
| rs1800407  | 15  | 28230318 | T             | 0.09 | 1.19 (1.16-1.23) | 0.02 | $1.82 \times 10^{-31}$  | $1.58 \times 10^{-6}$   | <i>OCA2</i>    |
| rs164745   | 16  | 89709664 | T             | 0.31 | 0.75 (0.73-0.76) | 0.01 | $6.80 \times 10^{-206}$ | $3.50 \times 10^{-42}$  | <i>CHMP1A</i>  |
| rs11648089 | 16  | 89713938 | C             | 0.11 | 0.70 (0.68-0.72) | 0.02 | $9.54 \times 10^{-130}$ | $5.06 \times 10^{-38}$  | <i>CHMP1A</i>  |
| rs3743861  | 16  | 89818340 | C             | 0.41 | 1.35 (1.33-1.37) | 0.01 | $3.37 \times 10^{-260}$ | $4.14 \times 10^{-57}$  | <i>FANCA</i>   |
| rs1006548  | 16  | 89844043 | C             | 0.22 | 0.72 (0.71-0.74) | 0.01 | $4.18 \times 10^{-205}$ | $5.35 \times 10^{-50}$  | <i>FANCA</i>   |
| rs2238529  | 16  | 89853117 | C             | 0.32 | 1.14 (1.12-1.16) | 0.01 | $6.42 \times 10^{-45}$  | $4.35 \times 10^{-7}$   | <i>FANCA</i>   |
| rs36233537 | 16  | 89884127 | G             | 0.03 | 0.66 (0.62-0.70) | 0.03 | $2.28 \times 10^{-47}$  | $3.54 \times 10^{-14}$  | <i>FANCA</i>   |
| rs12932219 | 16  | 89916391 | G             | 0.49 | 0.71 (0.70-0.72) | 0.01 | $3.87 \times 10^{-335}$ | $2.09 \times 10^{-86}$  | <i>SPIRE2</i>  |
| rs3803686  | 16  | 90020346 | C             | 0.19 | 0.87 (0.86-0.89) | 0.01 | $1.82 \times 10^{-35}$  | $3.68 \times 10^{-7}$   | <i>DEF8</i>    |
| rs11649211 | 16  | 90039450 | G             | 0.30 | 1.11 (1.09-1.13) | 0.01 | $1.25 \times 10^{-30}$  | $3.60 \times 10^{-14}$  | <i>AFG3L1P</i> |
| rs35176381 | 16  | 90062479 | G             | 0.37 | 1.55 (1.52-1.57) | 0.01 | $4.81 \times 10^{-512}$ | $1.05 \times 10^{-139}$ | <i>AFG3L1P</i> |
| rs77733403 | 16  | 90080723 | C             | 0.16 | 1.66 (1.62-1.70) | 0.01 | $7.67 \times 10^{-416}$ | $2.61 \times 10^{-82}$  | <i>DBNDD1</i>  |
| rs9922277  | 16  | 90158838 | C             | 0.36 | 1.25 (1.23-1.27) | 0.01 | $3.72 \times 10^{-139}$ | $3.86 \times 10^{-49}$  | <i>PRDM7</i>   |

**Supplementary Table 11. Summary of the SNP-by-sex interaction models.** For each SNP-by-sex interaction term significant in the UKBB study sample, we report the genomic coordinates (GRCh37.p13), the effect allele, the odds ratio (OR) along with its 95% confidence interval (CI) and standard error (SE), the association P value in the discovery set ( $P_{UKBB}$ ), and the meta-analysis P values in the four independent replication cohorts ( $P_{replication}$ ). Male was used as baseline in all the analysis. + indicates that the SNP is a secondary signal detected through conditional analysis

| SNP                     | CHR | BP       | Effect Allele | OR (95% CI)       | SE   | $P_{UKBB}$            | $P_{replication}$ |
|-------------------------|-----|----------|---------------|-------------------|------|-----------------------|-------------------|
| rs117132860             | 7   | 17134708 | A             | 0.85 (0.76; 0.94) | 0.05 | $1.73 \times 10^{-3}$ | 0.397             |
| rs1800407 <sup>+</sup>  | 15  | 28230318 | T             | 0.90 (0.85; 0.95) | 0.03 | $3.33 \times 10^{-4}$ | 0.052             |
| rs369230                | 16  | 89645437 | G             | 1.09 (1.05; 1.13) | 0.02 | $3.59 \times 10^{-6}$ | 0.154             |
| rs11648089 <sup>+</sup> | 16  | 89713938 | C             | 0.90 (0.85; 0.95) | 0.03 | $4.07 \times 10^{-4}$ | 0.338             |
| rs1006548               | 16  | 89844043 | C             | 0.93 (0.89; 0.97) | 0.02 | $9.70 \times 10^{-4}$ | 0.897             |

**Supplementary Table 12. CMM and non-melanoma skin cancer occurrence for the individuals in the UKBB study sample.**

|                                           | N       | Mean Age | SD   | First<br>Quantile | Third<br>Quantile |
|-------------------------------------------|---------|----------|------|-------------------|-------------------|
| <i>CMM cases</i>                          |         |          |      |                   |                   |
| All                                       | 907     | 58.01    | 7.91 | 52.00             | 64.00             |
| Male                                      | 372     | 58.80    | 7.76 | 53.00             | 65.00             |
| Female                                    | 535     | 57.46    | 7.97 | 51.50             | 64.00             |
| <i>Non-melanoma skin<br/>cancer cases</i> |         |          |      |                   |                   |
| All                                       | 5,912   | 61.28    | 6.53 | 58.00             | 66.00             |
| Male                                      | 3,035   | 61.97    | 6.26 | 59.00             | 67.00             |
| Female                                    | 2,877   | 60.55    | 6.73 | 57.00             | 66.00             |
| <i>Controls</i>                           |         |          |      |                   |                   |
| All                                       | 181,740 | 56.34    | 8.14 | 50.00             | 63.00             |
| Male                                      | 84,993  | 56.45    | 8.25 | 50.00             | 63.00             |
| Female                                    | 96,747  | 56.24    | 8.03 | 50.00             | 63.00             |

**Supplementary Table 13. Summary of associations with non-melanoma skin cancer.** For each locus passing the genome-wide significant threshold ( $P < 5 \times 10^{-8}$ ), we report its genomic coordinates (GRCh37.p13), the size of the region between the first and last genome-wide significant SNP, the number of SNPs passing genome-wide significance within the region ( $N_G$ ), as well as the leading SNP, its effect allele, odds ratio (OR) and 95% confidence interval (CI), and standard error (SE). Positive OR represent an increased incidence of non-melanoma skin cancer. All loci but *CPVL*, *DEFB135*, *FAM49A*, *IRF4*, *LINC-PINT*, *THNSL2*, and *RALY/ASIP* were previously reported in Chahal *et al.*, 2016 (PMID:27539887). *IRF4*, and *RALY/ASIP* were previously reported in Chahal *et al.*, 2016 (PMID:27424798). *FAM49A* and *LINC-PINT* were previously reported in Stacey *et al.*, 2015 (PMID: 25855136).

| Coordinate               | Size (bp) | $N_G$ | SNP         | Effect Allele | OR (95% CI)      | SE   | P                       | Gene                |
|--------------------------|-----------|-------|-------------|---------------|------------------|------|-------------------------|---------------------|
| chr1:17682100-17787980   | 105880    | 124   | rs7528427   | T             | 0.82 (0.79,0.85) | 0.02 | $1.27 \times 10^{-24}$  | <i>RCC2</i>         |
| chr1:228941920-229021613 | 79693     | 60    | rs12070203  | T             | 0.82 (0.78,0.85) | 0.02 | $7.97 \times 10^{-22}$  | <i>RHOU</i>         |
| chr2:7704860-7704860     | 1         | 1     | rs79522206  | A             | 0.75 (0.68,0.83) | 0.05 | $2.63 \times 10^{-8}$   | -                   |
| chr2:16499634-16499634   | 1         | 1     | rs16982256  | T             | 1.49 (1.29,1.73) | 0.07 | $4.59 \times 10^{-8}$   | <i>FAM49A</i>       |
| chr2:88559607-88594573   | 34966     | 30    | rs6709352   | C             | 1.23 (1.15,1.31) | 0.03 | $8.26 \times 10^{-10}$  | <i>THNSL2</i>       |
| chr2:202122995-202241907 | 118912    | 51    | rs3769823   | G             | 1.16 (1.12,1.21) | 0.02 | $1.83 \times 10^{-13}$  | <i>ALS2CR12</i>     |
| chr3:71503479-71544614   | 41135     | 16    | rs11707890  | G             | 0.89 (0.85,0.92) | 0.02 | $1.423 \times 10^{-10}$ | <i>FOXP1</i>        |
| chr5:1294086-1356771     | 62685     | 47    | rs31487     | C             | 1.18 (1.14,1.23) | 0.02 | $1.56 \times 10^{-18}$  | <i>CLPTM1L</i>      |
| chr6:385735-434364       | 48629     | 5     | rs147430042 | G             | 0.58 (0.5,0.68)  | 0.07 | $7.92 \times 10^{-13}$  | <i>IRF4</i>         |
| chr7:29132279-29132279   | 1         | 1     | rs117744081 | G             | 1.45 (1.28,1.64) | 0.06 | $2.62 \times 10^{-9}$   | <i>CPVL</i>         |
| chr7:130581358-130585623 | 4265      | 9     | rs157935    | G             | 1.14 (1.09,1.19) | 0.02 | $8.80 \times 10^{-10}$  | <i>LINC-PINT</i>    |
| chr8:11836318-1183631    | 1         | 1     | rs11774568  | A             | 0.89 (0.86,0.93) | 0.02 | $4.10 \times 10^{-8}$   | <i>DEFB135</i>      |
| chr8:77437038-77499451   | 62413     | 33    | rs17431641  | T             | 1.45 (1.32,1.58) | 0.04 | $2.13 \times 10^{-16}$  | <i>ZFHX4</i>        |
| chr8:100999637-101091569 | 91932     | 33    | rs10099237  | C             | 1.22 (1.16,1.29) | 0.03 | $5.28 \times 10^{-13}$  | <i>RGS22</i>        |
| chr9:22017836-22056499   | 38663     | 26    | rs10738605  | G             | 1.13 (1.08,1.17) | 0.02 | $5.61 \times 10^{-10}$  | <i>CDKN2B</i>       |
| chr10:8930198-9024785    | 94587     | 47    | rs76141549  | A             | 1.26 (1.19,1.34) | 0.03 | $1.98 \times 10^{-13}$  | <i>LOC105755953</i> |
| chr11:88912190-89058101  | 145911    | 11    | rs3900053   | C             | 0.88 (0.85,0.92) | 0.02 | $2.68 \times 10^{-10}$  | <i>TYR</i>          |
| chr12:52814230-52913668  | 99438     | 44    | rs11170164  | T             | 0.80 (0.75,0.85) | 0.03 | $2.03 \times 10^{-12}$  | <i>KRT5</i>         |
| chr16:89083136-90122562  | 1039426   | 94    | rs12925026  | T             | 0.75 (0.71,0.79) | 0.03 | $5.47 \times 10^{-24}$  | <i>MC1R</i>         |
| chr20:2224985-2304832    | 79847     | 29    | rs6082600   | C             | 0.80 (0.76,0.84) | 0.02 | $1.06 \times 10^{-18}$  | <i>TGM3</i>         |
| chr20:31551101-34269391  | 2718290   | 57    | rs6059655   | G             | 1.27 (1.20,1.35) | 0.03 | $7.91 \times 10^{-17}$  | <i>RALY/ASIP</i>    |

**Supplementary Table 14. Natural hair colour phenotype details for the individuals in the UKBB study sample.**

|                    | <b>N</b> | <b>Mean Age</b> | <b>SD</b> | <b>First Quantile</b> | <b>Third Quantile</b> |
|--------------------|----------|-----------------|-----------|-----------------------|-----------------------|
| <i>Red</i>         |          |                 |           |                       |                       |
| All                | 4,701    | 56.55           | 8.12      | 50.00                 | 63.00                 |
| Male               | 1,821    | 56.53           | 8.40      | 50.00                 | 63.00                 |
| Female             | 2,880    | 56.56           | 7.92      | 50.00                 | 63.00                 |
| <i>Blonde</i>      |          |                 |           |                       |                       |
| All                | 13,433   | 56.8            | 8.07      | 50.00                 | 63.00                 |
| Male               | 5,654    | 57.29           | 8.19      | 51.00                 | 64.00                 |
| Female             | 7,779    | 56.44           | 7.96      | 50.00                 | 63.00                 |
| <i>Light Brown</i> |          |                 |           |                       |                       |
| All                | 48,910   | 57.08           | 7.98      | 51.00                 | 64.00                 |
| Male               | 22,501   | 57.64           | 8.05      | 52.00                 | 64.00                 |
| Female             | 26,409   | 56.60           | 7.89      | 50.00                 | 63.00                 |
| <i>Dark</i>        |          |                 |           |                       |                       |
| All                | 51,733   | 56.66           | 8.08      | 50.00                 | 63.00                 |
| Male               | 26,625   | 56.84           | 8.16      | 50.00                 | 64.00                 |
| Female             | 25,108   | 56.46           | 8.00      | 50.00                 | 63.00                 |

**Supplementary Table 15. Hair colour distribution according to ease of skin tanning for the individuals in the UKBB study sample.**

|                          | <b>Red</b> | <b>Blonde</b> | <b>Light Brown</b> | <b>Dark</b> |
|--------------------------|------------|---------------|--------------------|-------------|
| <i>Low tan response</i>  |            |               |                    |             |
| All                      | 4701       | 6786          | 19694              | 14464       |
| Male                     | 1821       | 2488          | 7513               | 5791        |
| Female                   | 2880       | 4298          | 12181              | 8673        |
| <i>High tan response</i> |            |               |                    |             |
| All                      | 0          | 6647          | 29216              | 37269       |
| Male                     | 0          | 3166          | 14988              | 20834       |
| Female                   | 0          | 3481          | 14228              | 16435       |

**Supplementary Table 16. Summary of associations with non-red hair colour.** For each replicated locus, we report the effect allele, the effect (BETA) along with its 95% confidence interval (CI) standard error (SE), and the association P value in the UKBB study sample for both non-red hair colour (HC) and tanning ability (TA). Hair colour was coded using a numerical value with blonde=1, light brown=2, and dark=3. The dark category included both individuals with dark brown and black hair. Positive BETA<sub>HC</sub> represent an increase in hair darkness; positive BETA<sub>TA</sub> represent a decreased tanning ability.

| SNP         | Effect | N <sub>HC</sub> | BETA <sub>HC</sub> (95% CI) | SE <sub>sc</sub> | P <sub>sc</sub>          | BETA <sub>TA</sub> (95% CI) | SE <sub>TA</sub> | P <sub>TA</sub>         | Gene              |
|-------------|--------|-----------------|-----------------------------|------------------|--------------------------|-----------------------------|------------------|-------------------------|-------------------|
| rs1308048   | C      | 111956          | 0.001 (-0.005; 0.006)       | 0.00             | 0.795                    | -0.068 (-0.021; -0.115)     | -0.024           | 8.74x10 <sup>-15</sup>  | <i>PDE4B</i>      |
| rs12078075  | G      | 113480          | -0.050 (-0.060; -0.040)     | 0.00             | 3.20x10 <sup>-23</sup>   | 0.087 ( 0.016; 0.158)       | 0.036            | 1.03x10 <sup>-8</sup>   | <i>RIPK5</i>      |
| rs9818780   | C      | 111207          | -0.004 (-0.009; 0.002)      | 0.00             | 0.181                    | 0.048 ( 0.007; 0.089)       | 0.021            | 4.44x10 <sup>-8</sup>   | <i>PA2G4P4</i>    |
| rs16891982  | C      | 114076          | 0.299 ( 0.282; 0.316)       | 0.00             | 8.17x10 <sup>-259</sup>  | -0.920 (-0.579; -1.261)     | -0.174           | 1.19x10 <sup>-173</sup> | <i>SLC45A2</i>    |
| rs251464    | C      | 112039          | 0.002 (-0.005; 0.008)       | 0.00             | 0.619                    | -0.057 (-0.010; -0.104)     | -0.024           | 1.39x10 <sup>-8</sup>   | <i>PPARGC1B</i>   |
| rs12203592  | T      | 114076          | 0.254 ( 0.247; 0.260)       | 0.00             | 4.08x10 <sup>-1180</sup> | 0.545 ( 0.396; 0.694)       | 0.076            | 1.91x10 <sup>-567</sup> | <i>IRF4</i>       |
| rs117132860 | A      | 114076          | -0.015 (-0.032; 0.002)      | 0.00             | 0.092                    | 0.263 ( 0.098; 0.428)       | 0.084            | 4.10x10 <sup>-23</sup>  | <i>AHR/AGR3</i>   |
| rs2737212   | C      | 110542          | -0.003 (-0.008; 0.003)      | 0.00             | 0.338                    | 0.091 ( 0.036; 0.146)       | 0.028            | 6.98x10 <sup>-25</sup>  | <i>TRPS1</i>      |
| rs1326797   | T      | 113143          | 0.035 ( 0.029; 0.040)       | 0.00             | 1.35x10 <sup>-32</sup>   | -0.077 (-0.026; -0.128)     | -0.026           | 5.75x10 <sup>-18</sup>  | <i>TYRP1</i>      |
| rs10810650  | C      | 112034          | 0.026 ( 0.021; 0.032)       | 0.00             | 1.02x10 <sup>-19</sup>   | -0.145 (-0.074; -0.216)     | -0.036           | 3.15x10 <sup>-59</sup>  | <i>BNC2</i>       |
| rs35563099  | T      | 109800          | -0.005 (-0.013; 0.003)      | 0.00             | 0.207                    | -0.120 (-0.046; -0.194)     | -0.038           | 5.41x10 <sup>-23</sup>  | <i>EMX2</i>       |
| rs72917317  | G      | 109574          | -0.132 (-0.141; -0.123)     | 0.00             | 3.92x10 <sup>-166</sup>  | 0.165 ( 0.069; 0.261)       | 0.049            | 7.64x10 <sup>-30</sup>  | <i>TPCN2</i>      |
| rs1126809   | A      | 114076          | -0.040 (-0.046; -0.034)     | 0.00             | 1.98x10 <sup>-39</sup>   | 0.255 ( 0.159; 0.351)       | 0.049            | 4.81x10 <sup>-165</sup> | <i>TYR</i>        |
| rs9561570   | T      | 113736          | -0.036 (-0.042; -0.030)     | 0.00             | 5.34x10 <sup>-33</sup>   | 0.056 ( 0.011; 0.101)       | 0.023            | 1.19x10 <sup>-9</sup>   | <i>DCT</i>        |
| rs1046793   | C      | 113818          | 0.005 ( 0.000; 0.011)       | 0.00             | 0.053                    | -0.076 (-0.025; -0.127)     | -0.026           | 1.44x10 <sup>-18</sup>  | <i>ATP11A</i>     |
| rs746586    | T      | 113220          | -0.136 (-0.142; -0.130)     | 0.00             | 1.9x10 <sup>-506</sup>   | 0.062 ( 0.017; 0.107)       | 0.023            | 9.09x10 <sup>-13</sup>  | <i>SLC24A4</i>    |
| rs12913832  | A      | 114076          | 0.369 (0.363; 0.375)        | 0.00             | 3.17x10 <sup>-2736</sup> | -0.307 (-0.195; -0.419)     | -0.057           | 5.83x10 <sup>-182</sup> | <i>HERC2/OCA2</i> |
| rs369230    | G      | 113329          | -0.093 (-0.100; -0.087)     | 0.00             | 1.36x10 <sup>-184</sup>  | 0.466 ( 0.335; 0.597)       | 0.067            | 1.63x10 <sup>-500</sup> | <i>MC1R</i>       |
| rs6059655   | A      | 113302          | -0.114 (-0.124; -0.105)     | 0.00             | 4.88x10 <sup>-131</sup>  | 0.527 ( 0.358; 0.696)       | 0.086            | 6.08x10 <sup>-307</sup> | <i>RALY/ASIP</i>  |
| rs11703668  | G      | 112405          | 0.013 ( 0.007; 0.019)       | 0.00             | 4.88x10 <sup>-6</sup>    | -0.073 (-0.024; -0.122)     | -0.025           | 4.76x10 <sup>-17</sup>  | <i>KIAA0930</i>   |

**Supplementary Table 17. Summary of associations with red versus non-red hair colour.** For each replicated locus, we report the effect allele, the odds ratio (OR) along with its 95% confidence interval (CI) standard error (SE), and the association P value in the UKBB study sample for both red versus not-red hair colour (HC) and tanning ability (TA). Positive OR<sub>HC</sub> represent an increased incidence of red hair; positive OR<sub>TA</sub> represent a decreased tanning ability.

| SNP         | Effect Allele | N      | OR <sub>HC</sub> (95% CI) | SE <sub>HC</sub> | P <sub>HC</sub>         | OR <sub>TA</sub> (95% CI) | SE <sub>TA</sub> | P <sub>TA</sub>         | Gene              |
|-------------|---------------|--------|---------------------------|------------------|-------------------------|---------------------------|------------------|-------------------------|-------------------|
| rs1308048   | C             | 116563 | 0.96 (0.92; 1.00)         | 0.02             | 0.070                   | 0.93 (0.92; 0.95)         | 0.01             | 8.74x10 <sup>-15</sup>  | <i>PDE4B</i>      |
| rs12078075  | G             | 118155 | 0.99 (0.92; 1.07)         | 0.04             | 0.786                   | 1.09 (1.06; 1.12)         | 0.02             | 1.03x10 <sup>-8</sup>   | <i>RIPK5</i>      |
| rs9818780   | C             | 115800 | 1.01 (0.97; 1.05)         | 0.02             | 0.629                   | 1.05 (1.03; 1.07)         | 0.01             | 4.44x10 <sup>-8</sup>   | <i>PA2G4P4</i>    |
| rs16891982  | C             | 118777 | 0.70 (0.60; 0.82)         | 0.08             | 1.37x10 <sup>-5</sup>   | 0.40 (0.37; 0.43)         | 0.03             | 1.19x10 <sup>-173</sup> | <i>SLC45A2</i>    |
| rs251464    | C             | 116648 | 0.98 (0.94; 1.03)         | 0.03             | 0.492                   | 0.94 (0.93; 0.96)         | 0.01             | 1.39x10 <sup>-8</sup>   | <i>PPARGC1B</i>   |
| rs12203592  | T             | 118777 | 1.27 (1.21; 1.33)         | 0.02             | 1.61x10 <sup>-22</sup>  | 1.72 (1.69; 1.76)         | 0.01             | 1.91x10 <sup>-567</sup> | <i>IRF4</i>       |
| rs117132860 | A             | 118777 | 1.03 (0.91; 1.17)         | 0.07             | 0.621                   | 1.30 (1.24; 1.37)         | 0.03             | 4.10x10 <sup>-23</sup>  | <i>AHR/AGR3</i>   |
| rs2737212   | C             | 115095 | 1.03 (0.98; 1.07)         | 0.02             | 0.232                   | 1.09 (1.08; 1.11)         | 0.01             | 6.98x10 <sup>-25</sup>  | <i>TRPS1</i>      |
| rs1326797   | T             | 117799 | 0.98 (0.94; 1.02)         | 0.02             | 0.283                   | 0.93 (0.91; 0.94)         | 0.01             | 5.75x10 <sup>-18</sup>  | <i>TYRP1</i>      |
| rs10810650  | C             | 116646 | 0.96 (0.92; 1.00)         | 0.02             | 0.056                   | 0.86 (0.85; 0.88)         | 0.01             | 3.15x10 <sup>-59</sup>  | <i>BNC2</i>       |
| rs35563099  | T             | 114312 | 1.01 (0.95; 1.07)         | 0.03             | 0.822                   | 0.89 (0.87; 0.91)         | 0.01             | 5.41x10 <sup>-23</sup>  | <i>EMX2</i>       |
| rs72917317  | G             | 114088 | 1.09 (1.02; 1.17)         | 0.04             | 0.014                   | 1.18 (1.15; 1.21)         | 0.01             | 7.64x10 <sup>-30</sup>  | <i>TPCN2</i>      |
| rs1126809   | A             | 118777 | 0.99 (0.95; 1.04)         | 0.02             | 0.798                   | 1.29 (1.27; 1.31)         | 0.01             | 4.81x10 <sup>-165</sup> | <i>TYR</i>        |
| rs9561570   | T             | 118426 | 1.03 (0.99; 1.08)         | 0.02             | 0.141                   | 1.06 (1.04; 1.08)         | 0.01             | 1.19x10 <sup>-9</sup>   | <i>DCT</i>        |
| rs1046793   | C             | 118501 | 0.99 (0.95; 1.03)         | 0.02             | 0.550                   | 0.93 (0.91; 0.94)         | 0.01             | 1.44x10 <sup>-18</sup>  | <i>ATP11A</i>     |
| rs746586    | T             | 117885 | 0.98 (0.94; 1.02)         | 0.02             | 0.297                   | 1.06 (1.05; 1.08)         | 0.01             | 9.09x10 <sup>-13</sup>  | <i>SLC24A4</i>    |
| rs12913832  | A             | 118777 | 0.74 (0.70; 0.78)         | 0.03             | 4.23x10 <sup>-27</sup>  | 0.74 (0.72; 0.75)         | 0.01             | 5.83x10 <sup>-182</sup> | <i>HERC2/OCA2</i> |
| rs369230    | G             | 113329 | 4.66 (4.45; 4.88)         | 0.02             | 1.05x10 <sup>-905</sup> | 1.59 (1.56; 1.62)         | 0.01             | 1.63x10 <sup>-500</sup> | <i>MC1R</i>       |
| rs6059655   | A             | 117957 | 1.80 (1.70; 1.90)         | 0.03             | 2.33x10 <sup>-93</sup>  | 1.69 (1.65; 1.74)         | 0.01             | 6.08x10 <sup>-307</sup> | <i>RALY/ASIP</i>  |
| rs11703668  | G             | 117046 | 0.99 (0.95; 1.03)         | 0.02             | 0.617                   | 0.93 (0.91; 0.95)         | 0.01             | 4.76x10 <sup>-17</sup>  | <i>KIAA0930</i>   |

**Supplementary Table 18. Summary statistics of associations with natural hair colour for known MC1R variants.** For each variant, we report the effect allele, the effect size (OR/BETA) along with its 95% confidence interval (CI) and standard error (SE), the association P value in the UKBB study sample for red versus non-red hair colour (RH) and for non red-hair colour (non-RH). Positive  $OR_{RH}$  represent an increased incidence of red hair; positive  $BETA_{non-RH}$  represent an increase in hair darkness.

| Variant | SNP        | Effect Allele | $OR_{RH}$ (95% CI)   | $SE_{RH}$ | $P_{RH}$                 | $BETA_{non-RH}$ (95% CI) | $SE_{non-RH}$ | $P_{non-RH}$            |
|---------|------------|---------------|----------------------|-----------|--------------------------|--------------------------|---------------|-------------------------|
| D84E    | rs1805006  | A             | 2.66 (2.36; 3.00)    | 0.06      | $1.16 \times 10^{-56}$   | -0.153 (-0.178; -0.127)  | 0.013         | $6.55 \times 10^{-32}$  |
| D294H   | rs1805009  | C             | 5.84 (5.43; 6.28)    | 0.04      | $1.74 \times 10^{-487}$  | -0.128 (-0.147; -0.109)  | 0.010         | $1.80 \times 10^{-40}$  |
| I155T   | rs1110400  | C             | 1.00 (0.82; 1.21)    | 0.10      | 0.963                    | -0.096 (-0.123; -0.070)  | 0.013         | $4.62 \times 10^{-13}$  |
| R142H   | rs11547464 | A             | 4.03 (3.51; 4.64)    | 0.07      | $3.56 \times 10^{-85}$   | -0.104 (-0.138; -0.070)  | 0.018         | $2.25 \times 10^{-9}$   |
| R151C   | rs1805007  | T             | 10.67 (10.10; 11.27) | 0.03      | $4.89 \times 10^{-1529}$ | -0.195 (-0.205; -0.185)  | 0.005         | $4.05 \times 10^{-310}$ |
| R160W   | rs1805008  | T             | 3.73 (3.54; 3.93)    | 0.03      | $8.66 \times 10^{-348}$  | -0.156 (-0.167; -0.146)  | 0.005         | $7.54 \times 10^{-197}$ |
| R163Q   | rs885479   | A             | 0.14 (0.12; 0.17)    | 0.12      | $1.77 \times 10^{-59}$   | -0.007 (-0.019; 0.006)   | 0.007         | 0.310                   |
| V60L    | rs1805005  | T             | 0.29 (0.26; 0.32)    | 0.05      | $9.16 \times 10^{-125}$  | -0.044 (-0.053; -0.036)  | 0.004         | $5.20 \times 10^{-26}$  |
| V92M    | rs2228479  | A             | 0.097 (0.08; 0.12)   | 0.10      | $2.79 \times 10^{-125}$  | 0.0285 (0.0194; 0.038)   | 0.005         | $9.77 \times 10^{-10}$  |

**Supplementary Table 19. Summary statistics of associations with ease of skin tanning for known MC1R variants.** For each variant, we report the effect allele, the minor allele frequency (MAF), the odds ratio (OR) along with its 95% confidence interval (CI) and standard error (SE), the association P value in the UKBB study sample. Positive ORs represent a decreased tanning ability.

| Variant | SNP        | Effect Allele | MAF   | OR (95% CI)       | SE   | P                       |
|---------|------------|---------------|-------|-------------------|------|-------------------------|
| D84E    | rs1805006  | A             | 0.013 | 2.05 (1.90; 2.20) | 0.04 | $7.06 \times 10^{-82}$  |
| D294H   | rs1805009  | C             | 0.026 | 2.24 (2.13; 2.36) | 0.03 | $5.86 \times 10^{-204}$ |
| I155T   | rs1110400  | C             | 0.011 | 1.44 (1.33; 1.55) | 0.04 | $2.71 \times 10^{-20}$  |
| R142H   | rs11547464 | A             | 0.007 | 1.70 (1.54; 1.86) | 0.05 | $7.15 \times 10^{-28}$  |
| R151C   | rs1805007  | T             | 0.100 | 2.55 (2.48; 2.62) | 0.01 | $8.71 \times 10^{-907}$ |
| R160W   | rs1805008  | T             | 0.087 | 1.91 (1.86; 1.97) | 0.02 | $2.72 \times 10^{-403}$ |
| R163Q   | rs885479   | A             | 0.048 | 0.95 (0.91; 0.99) | 0.02 | $8.08 \times 10^{-3}$   |
| V60L    | rs1805005  | T             | 0.126 | 1.08 (1.05; 1.11) | 0.01 | $2.450 \times 10^{-9}$  |
| V92M    | rs2228479  | A             | 0.098 | 1.05 (1.02; 1.07) | 0.01 | $2.08 \times 10^{-3}$   |

**Supplementary Table 20. cis-eQTL enrichment in skin tissues from the GTEx project.** Using the replicated SNPs (both primary and secondary associations) extended with any SNP in high linkage disequilibrium ( $r^2 \geq 0.8$ ,  $N=599$ ) with them, we evaluated empirical enrichment P values (eP) by comparing the overlap between the set of cis-eQTLs in the GTEx project database with this extended set of SNPs and with the overlap obtained using 1,000 random sets of SNPs.

| <b>Tissue</b>                            | <b>eP</b>            |
|------------------------------------------|----------------------|
| <i>Skin (fibroblasts)</i>                | $1.0 \times 10^{-3}$ |
| <i>Sun exposed skin (Low leg)</i>        | $1.0 \times 10^{-3}$ |
| <i>Non-sun exposed skin (Suprapubic)</i> | 0.142                |

**Supplementary Table 21. Enrichment for histone markers in epithelial foreskin melanocyte primary cells from the RoadMap.** Using the replicated SNPs (both primary and secondary associations) extended with any SNP in high linkage disequilibrium ( $r^2 \geq 0.8$ ;  $N=599$ ) with them, we evaluated empirical enrichment P values (eP) by comparing the overlap between DNA accessibility peaks and histone marks data from the Roadmap project with this extended set of SNPs and with the overlap obtained using 1000 random sets of SNPs. Since the histone modifications data for the studied cell line was available from two donors we averaged the overlaps among samples.

| <b>Histone Mark</b> | <b>eP</b>            |
|---------------------|----------------------|
| <i>DNase</i>        | $1.0 \times 10^{-3}$ |
| <i>H3K27ac</i>      | $1.0 \times 10^{-3}$ |
| <i>H3K27me3</i>     | 0.076                |
| <i>H3K36me3</i>     | $2.0 \times 10^{-3}$ |
| <i>H3K4me1</i>      | $1.0 \times 10^{-3}$ |
| <i>H3K4me3</i>      | $3.0 \times 10^{-3}$ |
| <i>H3K9me3</i>      | 0.066                |

## Supplementary Notes

### The Melanoma Meta-analysis Consortium

Law MH<sup>1</sup>, Bishop DT<sup>2</sup>, Lee JE<sup>3</sup>, Brossard M<sup>4,5</sup>, Moses EK<sup>6</sup>, Song F<sup>7</sup>, Barrett JH<sup>2</sup>, Kumar R<sup>8</sup>, Easton DF<sup>9</sup>, Pharoah PD<sup>10</sup>, Swerdlow AJ<sup>11,12</sup>, Kypreou KP<sup>13</sup>, Taylor JC<sup>2</sup>, Harland M<sup>2</sup>, Randerson-Moor J<sup>2</sup>, Akslen LA<sup>14,15</sup>, Andresen PA<sup>16</sup>, Avril MF<sup>17</sup>, Azizi E<sup>18,19</sup>, Scarrà GB<sup>20,21</sup>, Brown KM<sup>22</sup>, Dębniak T<sup>23</sup>, Elder DE<sup>24</sup>, Fang S<sup>3</sup>, Friedman E<sup>19</sup>, Galan P<sup>25</sup>, Ghorzo P<sup>20,21</sup>, Gillanders EM<sup>26</sup>, Goldstein AM<sup>22</sup>, Gruis NA<sup>27</sup>, Hansson J<sup>28</sup>, Helsing P<sup>29</sup>, Hočevár M<sup>30</sup>, Höiom V<sup>28</sup>, Ingvar C<sup>31</sup>, Chen WV<sup>32</sup>; GenoMEL Consortium; Essen-Heidelberg Investigators; SDH Study Group; Q-MEGA and QTWIN Investigators; AMFS Investigators; ATHENS Melanoma Study Group, Landi MT<sup>22</sup>, Lang J<sup>33</sup>, Lathrop GM<sup>34</sup>, Lubiński J<sup>23</sup>, Mackie RM<sup>33,35</sup>, Mann GJ<sup>36</sup>, Molven A<sup>15,37</sup>, Montgomery GW<sup>38</sup>, Novaković S<sup>39</sup>, Olsson H<sup>40,41</sup>, Puig S<sup>42,43</sup>, Puig-Butille JA<sup>42,43</sup>, LI X<sup>44,45</sup>, Radford-Smith GL<sup>46,47,48</sup>, van der Stoep N<sup>49</sup>, van Doorn R<sup>27</sup>, Whiteman DC<sup>50</sup>, Craig JE<sup>51</sup>, Schadendorf D<sup>52,53</sup>, Simms LA<sup>45</sup>, Burdon KP<sup>54</sup>, Nyholt DR<sup>38,55</sup>, Pooley KA<sup>9</sup>, Orr N<sup>56</sup>, Stratigos AJ<sup>13</sup>, Cust AE<sup>57</sup>, Ward SV<sup>6</sup>, Hayward NK<sup>58</sup>, Schulze HJ<sup>59</sup>, Dunning AM<sup>10</sup>, Bishop JA<sup>2</sup>, Amos CI<sup>60</sup>, MacGregor S<sup>1</sup>

<sup>1</sup>Statistical Genetics, QIMR Berghofer Medical Research Institute, Brisbane, Queensland, Australia.

<sup>2</sup>Section of Epidemiology and Biostatistics, Leeds Institute of Cancer and Pathology, University of Leeds, Leeds, UK.

<sup>3</sup>Department of Surgical Oncology, University of Texas MD Anderson Cancer Center, Houston, Texas, USA.

<sup>4</sup>INSERM, UMR 946, Genetic Variation and Human Diseases Unit, Paris, France.

<sup>5</sup>Institut Universitaire d'Hématologie, Université Paris Diderot, Sorbonne Paris Cité, Paris, France.

<sup>6</sup>Centre for Genetic Origins of Health and Disease, Faculty of Medicine, Dentistry and Health Sciences, University of Western Australia, Perth, Western Australia, Australia.

<sup>7</sup>Department of Epidemiology and Biostatistics, Key Laboratory of Cancer Prevention and Therapy, Tianjin, National Clinical Research Center of Cancer, Tianjin Medical University Cancer Institute and Hospital, Tianjin, China.

<sup>8</sup>Division of Molecular Genetic Epidemiology, German Cancer Research Center, Heidelberg, Germany.

<sup>9</sup>Centre for Cancer Genetic Epidemiology, Department of Public Health and Primary Care, University of Cambridge, Cambridge, UK.

<sup>10</sup>Centre for Cancer Genetic Epidemiology, Department of Oncology, University of Cambridge, Cambridge, UK.

<sup>11</sup>Division of Genetics and Epidemiology, The Institute of Cancer Research, London, UK.

<sup>12</sup>Division of Breast Cancer Research, The Institute of Cancer Research, London, UK.

<sup>13</sup>Department of Dermatology, University of Athens School of Medicine, Andreas Sygros Hospital, Athens, Greece.

<sup>14</sup>Centre for Cancer Biomarkers (CCBIO), Department of Clinical Medicine, University of Bergen, Bergen, Norway.

<sup>15</sup>Department of Pathology, Haukeland University Hospital, Bergen, Norway.

<sup>16</sup>Department of Pathology, Molecular Pathology, Oslo University Hospital, Rikshospitalet, Oslo, Norway.

<sup>17</sup>Assistance Publique-Hôpitaux de Paris, Hôpital Cochin, Service de Dermatologie, Université Paris Descartes, Paris, France.

<sup>18</sup>Department of Dermatology, Sheba Medical Center, Tel Hashomer, Sackler Faculty of Medicine, Tel Aviv, Israel.

<sup>19</sup>Oncogenetics Unit, Sheba Medical Center, Tel Hashomer, Sackler Faculty of Medicine, Tel Aviv University, Tel Aviv, Israel.

<sup>20</sup>Department of Internal Medicine and Medical Specialties, University of Genoa, Genoa, Italy.

<sup>21</sup>Laboratory of Genetics of Rare Cancers, Istituto di Ricovero e Cura a Carattere Scientifico Azienda Ospedaliera Universitaria (IRCCS AOU) San Martino I'Istituto Scientifico Tumori Istituto Nazionale per la Ricerca sul Cancro, Genoa, Italy.

- <sup>22</sup>Division of Cancer Epidemiology and Genetics, National Cancer Institute, US National Institutes of Health, Bethesda, Maryland, USA.
- <sup>23</sup>International Hereditary Cancer Center, Pomeranian Medical University, Szczecin, Poland.
- <sup>24</sup>Department of Pathology and Laboratory Medicine, Perelman School of Medicine at the University of Pennsylvania, Philadelphia, Pennsylvania, USA.
- <sup>25</sup>Université Paris 13, Equipe de Recherche en Epidémiologie Nutritionnelle (EREN), Centre de Recherche en Epidémiologie et Statistiques, INSERM U1153, Institut National de la Recherche Agronomique (INRA) U1125, Conservatoire National des Arts et Métiers, Communauté d'Université Sorbonne Paris Cité, Bobigny, France.
- <sup>26</sup>Inherited Disease Research Branch, National Human Genome Research Institute, US National Institutes of Health, Baltimore, Maryland, USA.
- <sup>27</sup>Department of Dermatology, Leiden University Medical Center, Leiden, the Netherlands.
- <sup>28</sup>Department of Oncology-Pathology, Karolinska Institutet, Karolinska University Hospital, Stockholm, Sweden.
- <sup>29</sup>Department of Dermatology, Oslo University Hospital, Rikshospitalet, Oslo, Norway.
- <sup>30</sup>Department of Surgical Oncology, Institute of Oncology Ljubljana, Ljubljana, Slovenia.
- <sup>31</sup>Department of Surgery, Clinical Sciences, Lund University, Lund, Sweden.
- <sup>32</sup>Department of Genetics, University of Texas MD Anderson Cancer Center, Houston, Texas, USA.
- <sup>33</sup>Department of Medical Genetics, University of Glasgow, Glasgow, UK.
- <sup>34</sup>McGill University and Génome Québec Innovation Centre, Montreal, Quebec, Canada.
- <sup>35</sup>Department of Public Health, University of Glasgow, Glasgow, UK.
- <sup>36</sup>Centre for Cancer Research, University of Sydney at Westmead, Millennium Institute for Medical Research and Melanoma Institute Australia, Sydney, New South Wales, Australia.
- <sup>37</sup>Gade Laboratory for Pathology, Department of Clinical Medicine, University of Bergen, Bergen, Norway.
- <sup>38</sup>Molecular Epidemiology, QIMR Berghofer Medical Research Institute, Brisbane, Queensland, Australia.
- <sup>39</sup>Department of Molecular Diagnostics, Institute of Oncology Ljubljana, Ljubljana, Slovenia.
- <sup>40</sup>Department of Oncology/Pathology, Clinical Sciences, Lund University, Lund, Sweden.
- <sup>41</sup>Department of Cancer Epidemiology, Clinical Sciences, Lund University, Lund, Sweden.
- <sup>42</sup>Melanoma Unit, Departments of Dermatology, Biochemistry and Molecular Genetics, Hospital Clinic, Institut d'Investigacions Biomèdiques August Pi Suñer, Universitat de Barcelona, Barcelona, Spain.
- <sup>43</sup>Centro de Investigación Biomédica en Red (CIBER) de Enfermedades Raras, Instituto de Salud Carlos III, Barcelona, Spain.
- <sup>44</sup>Department of Epidemiology, Richard M. Fairbanks School of Public Health, Indiana University, Indianapolis, Indiana, USA.
- <sup>45</sup>Melvin and Bren Simon Cancer Center, Indiana University, Indianapolis, Indiana, USA.
- <sup>46</sup>Inflammatory Bowel Diseases, QIMR Berghofer Medical Research Institute, Brisbane, Queensland, Australia.
- <sup>47</sup>Department of Gastroenterology and Hepatology, Royal Brisbane and Women's Hospital, Brisbane, Queensland, Australia.
- <sup>48</sup>University of Queensland School of Medicine, Herston Campus, Brisbane, Queensland, Australia.
- <sup>49</sup>Department of Clinical Genetics, Center of Human and Clinical Genetics, Leiden University Medical Center, Leiden, the Netherlands.
- <sup>50</sup>Cancer Control Group, QIMR Berghofer Medical Research Institute, Brisbane, Queensland, Australia.
- <sup>51</sup>Department of Ophthalmology, Flinders University, Adelaide, South Australia, Australia.
- <sup>52</sup>Department of Dermatology, University Hospital Essen, Essen, Germany.
- <sup>53</sup>German Consortium for Translational Cancer Research (DKTK), Heidelberg, Germany.
- <sup>54</sup>Menzies Institute for Medical Research, University of Tasmania, Hobart, Tasmania, Australia.
- <sup>55</sup>Institute of Health and Biomedical Innovation, Queensland University of Technology, Brisbane, Queensland, Australia.
- <sup>56</sup>Breakthrough Breast Cancer Research Centre, The Institute of Cancer Research, London, UK.
- <sup>57</sup>Cancer Epidemiology and Services Research, Sydney School of Public Health, University of Sydney, Sydney, New South Wales, Australia.

<sup>58</sup>Oncogenomics, QIMR Berghofer Medical Research Institute, Brisbane, Queensland, Australia.

<sup>59</sup>Department of Dermatology, Fachklinik Hornheide, Institute for Tumors of the Skin at the University of Münster, Münster, Germany.

<sup>60</sup>Department of Community and Family Medicine, Geisel School of Medicine, Dartmouth College, Hanover, New Hampshire, USA.
